1 *Streptococcus agalactiae* induces placental macrophages to release extracellular traps loaded with  
2 tissue remodeling enzymes via an oxidative-burst-dependent mechanism  
3

4 Ryan S. Doster<sup>a</sup>, Jessica A. Sutton<sup>b</sup>, Lisa M. Rogers<sup>a</sup>, David M. Aronoff<sup>ff<sup>a,b,c,d</sup></sup>, and Jennifer A.  
5 Gaddy<sup>a,e,#</sup>  
6

7 <sup>a</sup>Division of Infectious Diseases, Department of Medicine, Vanderbilt University Medical Center,  
8 Nashville, Tennessee, U.S.A.

9 <sup>b</sup>Department of Microbiology and Immunology, Meharry Medical College, Nashville, Tennessee,  
10 U.S.A.

11 <sup>c</sup>Department of Obstetrics and Gynecology, Vanderbilt University Medical Center, Nashville,  
12 Tennessee, U.S.A.

13 <sup>d</sup>Department of Pathology, Microbiology and Immunology, Vanderbilt University Medical Center,  
14 Nashville, Tennessee, U.S.A.

15 <sup>e</sup>Tennessee Valley Healthcare Systems, Department of Veterans Affairs, Nashville, Tennessee,  
16 U.S.A.  
17

18 Running Title: Placental macrophages release METs in response to GBS  
19

20 Keywords: macrophage extracellular traps, GBS, matrix metalloproteinase  
21

22 #Address correspondence to Jennifer A. Gaddy, Ph.D., [jennifer.a.gaddy@vumc.org](mailto:jennifer.a.gaddy@vumc.org)

23 J.A.G and D.M.A contributed equally to this work.  
24

25 Abstract word count: 214

26 Text word count: 5858

27 **Abstract:**

28 *Streptococcus agalactiae*, or Group B *Streptococcus* (GBS), is a common perinatal pathogen. GBS  
29 colonization of the vaginal mucosa during pregnancy is a risk factor for invasive infection of the fetal  
30 membranes (chorioamnionitis) and its consequences such as membrane rupture, preterm labor,  
31 stillbirth, and neonatal sepsis. Placental macrophages, or Hofbauer cells, are fetally-derived  
32 macrophages present within placental and fetal membrane tissues that perform vital functions for fetal  
33 and placental development, including supporting angiogenesis, tissue remodeling, and regulation of  
34 maternal-fetal tolerance. Although placental macrophages, as tissue-resident innate phagocytes, are  
35 likely to engage invasive bacteria such as GBS, there is limited information regarding how these cells  
36 respond to bacterial infection. Here, we demonstrate *in vitro* that placental macrophages release  
37 macrophage extracellular traps (METs) in response to bacterial infection. Placental macrophage  
38 METs contain proteins including histones, myeloperoxidase, and neutrophil elastase similar to  
39 neutrophil extracellular traps and are capable of killing GBS cells. MET release from these cells  
40 occurs by a process that depends on the production of reactive oxygen species. Placental  
41 macrophage METs also contain matrix metalloproteases that are released in response to GBS and  
42 could contribute to fetal membrane weakening during infection. MET structures were identified within  
43 human fetal membrane tissues infected *ex vivo*, suggesting that placental macrophages release  
44 METs in response to bacterial infection during chorioamnionitis.

45

46 **Importance:**

47 *Streptococcus agalactiae*, also known as Group B *Streptococcus* (GBS), is a common pathogen  
48 during pregnancy where infection can result in chorioamnionitis, preterm premature rupture of  
49 membranes (PPROM), preterm labor, stillbirth, and neonatal sepsis. Mechanisms by which GBS  
50 infection results in adverse pregnancy outcomes are still incompletely understood. This study  
51 evaluated interactions between GBS and placental macrophages. The data demonstrate that in  
52 response to infection, placental macrophages release extracellular traps capable of killing GBS.

53 Additionally, this work establishes that proteins associated with extracellular trap fibers include  
54 several matrix metalloproteinases that have been associated with chorioamnionitis. In the context of  
55 pregnancy, placental macrophage responses to bacterial infection might have beneficial and adverse  
56 consequences, including protective effects against bacterial invasion but also releasing important  
57 mediators of membrane breakdown that could contribute to membrane rupture or preterm labor.

58

## 59 **Introduction:**

60 15 million cases of preterm birth, or birth before 37 weeks gestation, occur annually worldwide,  
61 including 500,000 cases in the United States, conferring an estimated cost of \$26.2 billion (1-3). The  
62 World Health Organization estimates that preterm birth complications are a leading cause of death  
63 among children under five years of age, resulting in nearly 1 million deaths in 2015 (4, 5). In addition  
64 to loss of child lives, preterm birth increases risk of chronic health conditions including  
65 neurodevelopmental deficits, metabolic syndrome, cardiovascular abnormalities, chronic kidney  
66 disease, and chronic respiratory conditions (6, 7).

67 *Streptococcus agalactiae*, also known as Group B *Streptococcus* (GBS), is a common  
68 perinatal pathogen (8). Approximately 10-40% of women are colonized with GBS during late  
69 pregnancy (9, 10). Rectovaginal GBS carriage is associated with adverse pregnancy outcomes  
70 including stillbirth, preterm labor, chorioamnionitis, and neonatal sepsis (11-13). Because of the  
71 burden and severity of GBS-related adverse pregnancy outcomes, the CDC recommends GBS  
72 screening late in gestation and antibiotic prophylaxis during labor (14). This strategy has decreased  
73 the incidence of early-onset neonatal sepsis but misses mothers that deliver preterm, before  
74 screening is conducted (14). Despite screening and treatment interventions, GBS remains a leading  
75 neonatal pathogen (15).

76 Pregnancy represents a unique immunologic state in which the maternal immune system must  
77 dampen its responses against foreign antigens of the semiallogenic fetus while defending the gravid  
78 uterus from infection. Excessive inflammation can drive adverse pregnancy events including loss of

79 pregnancy, preterm birth, intrauterine growth restriction, and preeclampsia (16). Multiple mechanisms  
80 exist to support maternal-fetal tolerance including production of anti-inflammatory cytokines that alter  
81 the number and function of immune cells at the maternal-fetal interface (17-19). Unfortunately,  
82 infection is a common complication of pregnancy. Bacterial infection of the fetal membranes, known  
83 as chorioamnionitis, occurs most often by ascending infection from the vagina (8, 20, 21). During  
84 infection, bacterial products are recognized by pathogen recognition receptors, which then stimulate  
85 production of proinflammatory cytokines (20, 22, 23). These inflammatory mediators initiate a  
86 cascade of events that result in neutrophil infiltration into the fetal membranes, production and  
87 release of matrix metalloproteases (MMPs), and cervical contractions which eventually result in  
88 membrane rupture and preterm birth (24).

89         Macrophages represent 20-30% of the leukocytes within gestational tissues (25). In particular,  
90 fetally-derived macrophages, called Hofbauer cells or placental macrophages (PMs), play key roles in  
91 placental invasion, angiogenesis, tissue remodeling, and development (26, 27). The inflammatory  
92 state of these cells is carefully regulated throughout pregnancy. As the pregnancy progresses the M2  
93 or anti-inflammatory and tissue remodeling phenotype predominates to supports fetal development  
94 (28-31). PMs contribute to immune tolerance by secretion of anti-inflammatory cytokines, which  
95 suppress production of proinflammatory cytokines (32-35). Disruption of appropriate macrophage  
96 polarization is associated with abnormal pregnancies including spontaneous abortions, preterm labor,  
97 and preeclampsia (28). We sought to understand how bacterial infection alters PM functions, and how  
98 these responses may contribute to pathologic pregnancies. These studies demonstrate that both PMs  
99 and a model macrophage cell line, the PMA-differentiated THP-1 macrophage-like cells, release  
100 macrophage extracellular traps (METs) in response to bacterial infection in a process that is  
101 dependent upon the generation of reactive oxygen species (ROS). METs, reminiscent of neutrophil  
102 extracellular traps (NETs), have recently been recognized as structures released by macrophages  
103 under a number of conditions including infection (36). PM METs contain histones, myeloperoxidase,

104 and neutrophils elastase as well as several MMPs, and MET structures are found within human fetal  
105 membranes infected with GBS *ex vivo*.

## 107 **Results:**

### 108 **Placental macrophages release METs in response to GBS:**

109 To understand PM responses to GBS at the host-pathogen interface, isolated PMs were infected *ex*  
110 *vivo* with GBS and cellular interactions examined using field-gun high-resolution scanning electron  
111 microscopy (SEM). At one hour following infection, fine, reticular structures were noted extending  
112 from macrophages, and these structures were less abundant in uninfected samples (Figure 1A, lower  
113 panels). These structures resembled NETs. Recent reports suggest that macrophages also release  
114 fibers composed of DNA and histones, known as METs (36, 37). To determine if these structures  
115 were METs, macrophages were evaluated by scanning laser confocal microscopy after staining with  
116 the DNA binding dye SYTOX Green, which demonstrated extracellular structures extending from PMs  
117 that were not seen when PMs were treated with DNase I (Figure 1A, top panels). Cells were then  
118 evaluated to assess the degree to which these structures contained proteins previously associated  
119 with NETs and METs, including histones, myeloperoxidase, and neutrophil elastase (36, 37). Each of  
120 these proteins co-localized to extracellular DNA structures extending from the PMs (Figure 1B). The  
121 staining for MET-associated proteins was specific as no fluorescent signal was seen when either a  
122 secondary conjugated antibody alone or an isotype control secondary conjugated antibody was used  
123 to evaluate these structures (Sup. Figure 1). Together, these data suggest that these structures are  
124 METs released by PMs. The extent of MET release was then quantified, and PMs co-cultured with  
125 GBS released significantly more METs than uninfected cells and DNase I treatment degraded these  
126 extracellular structures (Figure 1C). Additionally, MET release by PMs occurred in a dose dependent  
127 fashion (Sup. Fig 2A), and MET release was not GBS strain or bacterial species specific as PMs  
128 infected with GBS strain GB037, a capsular type V strain, *Escherichia coli*, or heat killed bacteria  
129 resulted in similar MET release (Sup. Figure 3).

130 One major immunologic function of extracellular traps is the ability to immobilize and kill  
131 microorganisms through the locally high concentration of cellular proteins including histones that have  
132 antimicrobial effects (37, 38). In order to investigate the bactericidal activity of PM METs, PMs were  
133 co-cultured with GBS cells alone or in the presence of DNase I. After 1 hour of infection, significantly  
134 more bacterial colony forming units (CFU) were recovered from co-cultures treated with DNase I,  
135 suggesting that PM METs have bactericidal activity and eliminating METs with DNase treatment  
136 impaired bacterial killing (Figure 1D). To verify that DNase treatment itself did not result in significant  
137 PM cell death, thus decreasing bactericidal ability, PMs were incubated with DNase I for one hour  
138 prior to washing and stimulating PMs with heat-killed GBS for 24 hours. PM TNF- $\alpha$  release was used  
139 as a marker of macrophage viability and function; there was no difference in TNF- $\alpha$  from supernatants  
140 of cells treated with DNase compared to untreated cells (Sup. Figure 2B). Additionally, live-dead  
141 bacterial staining of PMs infected with GBS demonstrated dead GBS cells adjacent to MET fibers  
142 (Sup. Figure 2C). Together, these data provide evidence that PMs release METs in response to  
143 bacteria and that these structures are capable of killing GBS cells.

144 Extracellular trap formation, or etosis, occurs by a cell death pathway distinct from pyroptosis  
145 and apoptosis (39). To investigate if GBS infection results in different cell death pathways, GBS  
146 infected PMs were assayed for LDH release as a marker of cellular death, TUNEL staining as a  
147 marker of apoptosis, and IL-1 $\beta$  release to indicate pyroptosis. At one hour of GBS infection,  
148 supernatants of PMs co-cultured with GBS demonstrated an increase in macrophage death,  
149 determined by LDH release (Sup. Figure 4A). However, GBS infected PMs did not exhibit a  
150 significant difference in IL-1 $\beta$  release or TUNEL positive cells compared to uninfected cells treated  
151 with vehicle controls at 1 hour (Sup. Figure 4B-D).

### 152 **PMA-differentiated THP-1 macrophage-like cells release METs after direct bacterial contact:**

153 Experiments were conducted to determine if MET responses against GBS were specific to PMs or  
154 might represent a broader macrophage response. The immortalized monocyte-like cell line, THP-1  
155

156 cells, was evaluated after differentiation into macrophage-like cells with phorbol 12-myristate 13-  
157 acetate (PMA) for 24 hours. THP-1 macrophage-like cells infected with GBS released significantly  
158 more METs than uninfected cells, and DNase I treatment degraded the MET structures (Sup. Figure  
159 5). The THP-1 MET response required contact with bacterial cells, as treatment of the macrophage-  
160 like cells with sterile filtered bacterial culture supernatant did not stimulate MET release compared to  
161 uninfected cells.

### 162 **Actin polymerization is required for GBS-induced MET release:**

163 Actin polymerization has been shown to be important for MET release (36). A similar role of  
164 cytoskeletal changes on GBS-induced MET release in THP-1 macrophage-like cells was examined.  
165 Treatment prior to infection with the actin polymerization inhibitor, cytochalasin D, but not nocodazole,  
166 which inhibits microtubule polymerization, inhibited MET release compared to GBS infected,  
167 untreated cells (Sup. Figure 5). As noted below (and shown in Figure 2B), cytochalasin D also  
168 inhibited MET release by human PMs infected with GBS.

### 169 **Placental macrophage MET responses require ROS production:**

170  
171 Neutrophil release of NETs occurs in a ROS-dependent manner (40). It was hypothesized that MET  
172 release from PMs may require production of ROS. Treatment of PMs prior to infection with the  
173 NADPH oxidase inhibitor diphenyleneiodonium (DPI) inhibited release of METs, whereas treatment of  
174 uninfected macrophages with PMA resulted in similar levels of MET release to GBS infected cells  
175 (Figure 2A, B). As with the THP-1 macrophage-like cells, treatment of PMs with cytochalasin D prior  
176 to infection inhibited MET release. To further define that ROS production was associated with MET  
177 release a fluorescent ROS dye was used to evaluate PMs for intracellular ROS production. Treatment  
178 with DPI inhibited ROS production, and GBS infection as well as PMA treatment of uninfected PMs  
179 resulted in significantly more ROS production than uninfected cells (Figure 2C, D). Interestingly,  
180 pretreatment with cytochalasin D decreased levels of intracellular ROS production similar to that of  
181

182 DPI, suggesting that pretreatment with the actin cytoskeletal inhibitor may actually be preventing MET  
183 release by impeding ROS production. Additionally, ROS production in these experiments mirrored the  
184 degree of MET release under similar conditions (Figure 2B), suggesting that ROS production is  
185 necessary for MET release from these macrophages.

186  
187 **Placental macrophage METs contain MMPs:** During pregnancy, PMs support gestational tissue  
188 remodeling through release of MMPs. Because macrophage release of MMPs has been implicated in  
189 the pathogenesis of fetal membrane rupture (41), we hypothesized that these proteases may also be  
190 released in METs. Five MMPs that have been implicated in development and pathologic pregnancies  
191 were evaluated. Immunofluorescent staining of METs was significant for the co-localization of MMP-1,  
192 -7, -8, -9, and -12 with extracellular DNA structures (Figure 3A). As MMPs are present within METs  
193 and GBS infection induced MET release, metalloprotease concentrations within co-culture  
194 supernatants were examined to determine if GBS infection would result in an increase in  
195 metalloprotease release. MMP-8 and MMP-9 have been investigated as potential biomarkers for  
196 intrauterine infection (42-44), and concentrations of both were significantly elevated in supernatants  
197 of GBS infected cells compared to uninfected controls (Figure 3B, C). Global MMP activity of co-  
198 culture supernatants was then assessed to determine if the MMPs released were active by using a  
199 MMP activity assay, which uses fluorescence resonance energy transfer peptides that, when cleaved  
200 by MMPs, are fluorescent. Supernatants taken from placental macrophages co-cultured with GBS  
201 demonstrated significantly more MMP activity compared to uninfected controls (Figure 3D). Together  
202 these data suggest that PMs express several MMPs, and these MMPs are released during bacterial  
203 infection within METs and into the extracellular spaces, where they might contribute to breakdown of  
204 gestational tissue extracellular matrix.

205  
206 **MET structures are present in human fetal membrane tissues infected *ex vivo*:** To determine if  
207 METs were present within gestational tissues in response to infection, fetal membrane tissues from



208 healthy, term, non-laboring caesarian sections were obtained, excised, and organized into transwell  
209 structures, creating two chambers separated by the fetal membranes. GBS cells were added to the  
210 choriodecidual surface and infection was allowed to progress for 48 hours prior to fixing tissues for  
211 immunohistochemistry and immunofluorescence analysis. CD163-positive cells were found localized  
212 to an area of GBS microcolonies within the membranes that demonstrated histone staining extending  
213 beyond the nucleus and into the extracellular space, suggesting the release of a MET-like structure  
214 (Figure 4A). Immunofluorescence staining demonstrated CD163-positive cells associated with  
215 extracellular material that stained positive for histones and MMP-9 (Figure 4B). Additional staining of  
216 fetal membrane tissues using neutrophil elastase as was previously described for identification of  
217 NETs in tissues (45), identified cells within the choriodecidia with long extensions that stained  
218 strongly for neutrophil elastase that co-localized to histone H3 and DNA staining (Sup. Figure 6).  
219 Cells releasing MET-like structures could be compared to cells with intact nuclei and neutrophil  
220 elastase staining limited to granule structures suggesting that cells releasing MET-like structures had  
221 undergone cellular changes consistent with etosis.

## 222

### 223 **Discussion:**

224 In the initial description of NETs in 2004, several potential immune functions were described including  
225 the trapping and killing of microorganisms and degradation of bacterial products (37). Release of  
226 cellular DNA and proteins within extracellular traps has also been associated with autoimmune  
227 pathology in systemic lupus erythematosus and anti-neutrophil cytoplasmic autoantibodies (ANCA)-  
228 associated vasculitis, as well as and in diseases of aseptic inflammation (46-50). Other leukocytes  
229 including mast cells, eosinophils, basophils and macrophages have now been shown to release  
230 extracellular trap structures (36, 51-54).

231 In this manuscript, PMs are added to a growing list of monocytes and tissue differentiated  
232 macrophages capable of releasing METs, which includes human alveolar macrophages, glomerular  
233 macrophages, peripheral blood monocytes, and macrophages from other mammalian and non-

234 mammalian species (36). These data demonstrate that human PMs and PMA-differentiated THP-1  
235 macrophage-like cells release METs in response to bacterial infection and after treatment with the  
236 protein kinase C agonist, PMA. The present data correlate with previous reports that neutrophils and  
237 murine macrophages release traps in response to GBS infection and that METs are capable of killing  
238 GBS cells (55, 56).

239 These data also demonstrate that PM METs contain many proteins previously identified in  
240 NETs, including histones, neutrophil elastase, and myeloperoxidase (37). These results mirror other  
241 MET investigations demonstrating that diverse macrophages produce and release proteins including  
242 neutrophil elastase within MET structures. For example, human glomerular macrophages releasing  
243 METs containing myeloperoxidase has been demonstrated in cases of ANCA-associated  
244 glomerulonephritis and human alveolar macrophages have been shown to release METs containing  
245 histones and MMP-9 (57, 58). Human blood monocytes release METs containing H3 histones,  
246 myeloperoxidase, lactoferrin, and neutrophil elastase in response to *Candida albicans* cells, and  
247 similar MET contents have been demonstrated in THP-1 macrophage-like cells infected with  
248 *Mycobacterium massiliense* (59, 60).

249 Similar to neutrophil etosis, these data suggest that ROS generation is necessary for PM MET  
250 release as this response was inhibited by treatment with the NADPH oxidase inhibitor, DPI. These  
251 results mirror reports that inhibition of ROS production via chemical inhibitors resulted in diminished  
252 MET release in bovine, caprine, murine, and human macrophages (61-65). In neutrophils, ROS act to  
253 break down intracellular membranes and activates neutrophil elastase, which translocates to the  
254 nucleus where it degrades histones and promotes chromatin decondensation (39). Myeloperoxidase  
255 is thought to contribute chromatin decondensation by a enzymatic-independent mechanism (39). It is  
256 unclear at this time if neutrophil elastase and myeloperoxidase perform similar roles in macrophages.

257 Our data indicate an increase in LDH release during infection, which is consistent with reports  
258 that MET release results in cell death (66). Etosis has been noted to be distinct from other cellular  
259 death pathways including pyroptosis and apoptosis. At one hour of infection when MET responses

were identified, there was no significant difference in TUNEL staining or IL-1 $\beta$  release suggesting that PM METs occur by a distinct pathway. This is notable as previous reports have shown that the GBS toxin  $\beta$ -hemolysin is capable of inducing pyroptosis of macrophages, though in this study infection was allowed to progress for 4 hours, longer than that required for the PM MET response (67). Previous studies have also demonstrated that GBS is capable to inducing macrophage apoptosis, but again this occurred over longer periods of infection than the one hour that was capable of inducing MET responses (68).

Pretreatment of THP-1 macrophage-like cells and PMs with the actin cytoskeletal inhibitor, cytochalasin D, inhibited MET release, but not the microtubule inhibitor, nocodazole. Conflicting reports exist regarding the role of actin polymerization in etosis. Studies evaluating bovine macrophages and THP-1 cells demonstrated a decrease in MET release after cytochalasin treatment, but similar treatment of murine J744A.1 macrophage-like cells, RAW macrophage-like cells, and bovine blood monocytes did not have a significant effect on MET release (60, 61, 64, 69). This collection of conflicting reports mirrors the NET literature. In the original NET description, cytochalasin D prevented cell phagocytosis but not NET release (37). Others have documented NET inhibition with nocodazole or cytochalasin D in response to LPS or enrofloxacin (70, 71). Because of the differential responses, some authors have postulated that phagocytosis may be an important first step towards cell stimulation and ROS generation, and cytoskeletal inhibition may block the initial steps toward MET release. Another possibility is that the pretreatment with cytochalasin D may interrupt trafficking of the NADPH oxidase complex, thus impairing ROS production. NADPH oxidase is a complex of six components, and the cytosolic proteins p40<sup>phox</sup> and p47<sup>phox</sup> are known to interact with F-actin; treatment with cytochalasins have been shown to interrupt NADPH complex formation and lead to impaired ROS formation (72, 73). Timing of the cytochalasin treatment is important, as treatment of cells after pre-stimulation with molecules such as LPS, which stimulates NADPH oxidase assembly, may actually increase generation of ROS in these cells (74). In our study, macrophages were pretreated with cytochalasin D and were not stimulated prior to infection. It remains unclear if the

286 conflicting literature with regards to the impact of cytoskeletal inhibition on extracellular traps may be  
287 explained by the timing of cytoskeletal inhibition and subsequent effects on ROS production.

288 PMs were found to produce and release several MMPs within MET structures. During  
289 chorioamnionitis, inflammatory mediators lead to the production and release of several  
290 metalloproteinases including MMP-1, MMP-7, MMP-8, and MMP-9 (75, 76). MMP-9 is considered to  
291 be the major MMP responsible for collagenase activity within the membranes, but many other MMPs  
292 are thought to contribute to the processes of membrane weakening (75, 77). This study reinforces  
293 and expands previous reports that identified placental leukocytes as being able to secrete MMPs  
294 including MMP-1, -7, and -9 (78). Several MMPs have been implicated in preterm birth and pathologic  
295 pregnancies. MMP-1 and MMP-9 were found to be elevated in placental tissues of women with  
296 preterm births compared to women delivering at full term (79). MMP-1 and neutrophil elastase have  
297 been shown to stimulate uterine contractions (80). Interestingly, proteomic comparisons of amniotic  
298 fluid from women with premature preterm rupture of membranes demonstrated increases in histones  
299 (H3, H4, H2B), myeloperoxidase, neutrophil elastase, and MMP-9 in women with histologic  
300 chorioamnionitis and proven intrauterine infection, which likely represents the influx of inflammatory  
301 cells into these tissues and potentially release of extracellular traps (81). MMP-12, or macrophage  
302 metalloelastase, is a key mediator of the breakdown of elastase and has been shown to be important  
303 for spiral artery remodeling during parturition, but to date there are no studies demonstrating changes  
304 in MMP-12 release during cases of pathologic pregnancies (82). MMP-12 is better studied in  
305 conditions of lung pathology including emphysema, and alveolar macrophages are known to release  
306 MMP-12 in METs during infection, suggesting that protease release from leukocytes may contribute  
307 to this disease process (65). Analogous to a controlled burn, we speculate that tethering MMPs to  
308 MET structures allows the host to control the release of these potent enzymes, thereby limiting their  
309 capacity to broadly weaken membrane structure in response to infection.

310 MET release appears to occur within fetal membrane tissue as demonstrated by our  
311 immunohistochemistry and immunofluorescence data. This report adds to the growing relevance of

312 these structures within cases of disease pathology. NETs have previously been identified in placenta  
313 tissues from women with pregnancies complicated by systemic lupus erythematosus and  
314 preeclampsia (83, 84). NETs were also found in fetal membrane samples of women with  
315 spontaneous preterm labor due to acute chorioamnionitis (85). Interestingly, in this report, antibody  
316 staining with histone H3 and neutrophil elastase was used to denote NET structures, but given our  
317 data, this staining pattern would not have differentiated METs from NETs. Additionally, our group and  
318 others have demonstrated that in animal models of vaginal colonization and perinatal infection with  
319 GBS, neutrophils traffic to GBS-infected gestational tissues and release NETs containing  
320 antimicrobial peptides including lactoferrin as a means to control bacterial growth and invasion (86-  
321 88).

322 In conclusion, we demonstrate that placental macrophages as well as PMA-differentiated THP-  
323 1 cells respond to bacterial infection by releasing METs. These MET structures contain proteins  
324 similar to NETs, including histones, myeloperoxidase, and neutrophil elastase. MET release from  
325 these macrophages can be stimulated in the absence of bacterial cells with PMA and is inhibited by  
326 pathways that impair ROS production. Placental macrophage METs contain several MMPs that have  
327 been implicated in pathologic pregnancies including premature rupture of membranes. MET  
328 structures were identified in human fetal membrane tissue infected *ex vivo*. Together these results  
329 suggest that placental macrophages, which are thought to help maintain maternal fetal tolerance and  
330 aid in extracellular matrix remodeling, are capable of responding to GBS infection in a way that may  
331 trap and kill GBS cells but may also release important mediators of fetal membrane extracellular  
332 matrix digestion that could potentially contribute to infection related pathologies including preterm  
333 rupture of membrane and preterm birth.

### 334 **Materials and Methods:**

335 **Placental macrophage isolation and culture:** Human placental macrophages (PM) and fetal  
336 membrane tissues were isolated from placental tissues from women who delivered healthy infants at  
337

338 full term by cesarean section (without labor). De-identified tissue samples were provided by the  
339 Cooperative Human Tissue Network, which is funded by the National Cancer Institute. All tissues  
340 were collected in accordance with Vanderbilt University Institutional Review Board (approval 131607).  
341 Macrophage isolation occurred as previously described (89); briefly, placental villous tissue was  
342 minced followed by digestion with DNase, collagenase, and hyaluronidase (all from Sigma-Aldrich, St.  
343 Louis MO). Cells were filtered, centrifuged, and CD14<sup>+</sup> cells were isolated using the magnetic MACS  
344 Cell Separation system with CD14 microbeads (Miltenyi Biotec, Auburn CA). Cells were incubated in  
345 in RPMI 1640 media (ThermoFisher, Waltham MA) with 10% charcoal stripped fetal bovine serum  
346 (ThermoFisher) and 1% antibiotic/antimycotic solution (ThermoFisher) overnight at 37°C in 5%  
347 carbon dioxide. The following day, PMs were suspended in RPMI media without antibiotic/antimycotic  
348 and distributed into polystyrene plates. Cells were incubated for at least 1 hour prior to infection to  
349 allow for cell adherence to plate or Poly-L-Lysine coated glass coverslips (Corning, Bedford MA) for  
350 microscopy assays.

351  
352 **THP-1 cell culture:** THP-1 cells (ATCC, Manassas VA) were cultured in RPMI 1640 media with 10%  
353 charcoal treated FBS and 1% antibiotic/antimycotic media at 37°C in 5% carbon dioxide. 24-48 hours  
354 prior to co-culture experiments, cells were treated with 100 nM phorbol 12-myristate 13-acetate  
355 (PMA) (Sigma-Aldrich) to induce differentiation to macrophage-like cells. Prior to co-culture  
356 experiments, cells were suspended in RPMI media without antibiotic/antimycotic and distributed into  
357 polystyrene plates containing Poly-L-Lysine coated glass coverslips and allowed to rest for at least 1  
358 hour prior to infection to promote cell adherence.

359  
360 **Bacterial Culture:** *Streptococcus agalactiae* strain GB590 is a capsular type III, ST-17 strain isolated  
361 from a woman with asymptomatic colonization (90), and GB037 is a capsular type V strain obtained  
362 from a case of neonatal sepsis (91, 92). *Escherichia coli* serotype 075:H5:K1 is a clinical isolate  
363 obtained from a fatal case of neonatal meningitis (93). Bacterial cells were cultured on tryptic soy

364 agar plates supplemented with 5% sheep blood (blood agar plates) at 37°C in ambient air overnight.  
365 Bacteria were subcultured from blood agar plates into Todd-Hewitt broth or Luria Broth and incubated  
366 under aerobic shaking conditions at 37°C in ambient air to stationary phase. Bacterial supernatant  
367 was collected and sterile filtered using a 0.1 µm filter (Millipore Sigma, Burlington MA) and incubated  
368 with THP-1 cells at a concentration of 10% volume. Bacterial cells were washed and suspended in  
369 phosphate buffered saline (PBS, pH 7.4) and bacterial density was measured spectrophotometrically  
370 at an optical density of 600 nm (OD<sub>600</sub>) and bacterial numbers were determined with a coefficient of 1  
371 OD<sub>600</sub> = 10<sup>9</sup> CFU/mL.

372  
373 **Bacterial-macrophage co-cultures:** PMs or PMA-differentiated macrophage-like cells in RPMI  
374 without antibiotics were infected with GBS or *E. coli* cells at a multiplicity of infection (MOI) of 20:1  
375 unless otherwise noted. Co-cultured cells were incubated at 37°C in air supplemented to 5% carbon  
376 dioxide for 1 hour. As stated, some cells were pretreated with 10 µg/mL cytochalasin D  
377 (ThermoFisher), 10 nM nocodazole, 100 Units/mL DNase I, 500 nM PMA, or 10µM  
378 diphenyleneiodonium chloride (all from Sigma-Aldrich) for at least 20 minutes prior to infection. At 1  
379 hour, supernatants were collected and cells were fixed with 2.0% paraformaldehyde and 2.5%  
380 glutaraldehyde in 0.05 M sodium cacodylate buffer (Electron Microscopy Sciences, Hatfield PA) for at  
381 least 12 hours prior to processing for microscopy.

382  
383 **Field-emission gun scanning electron microscopy:** Following treatment and infection as above,  
384 macrophages were incubated in 2.0% paraformaldehyde and 2.5% glutaraldehyde in 0.05 M sodium  
385 cacodylate buffer for at least 12 hours prior to sequential dehydration with increasing concentrations  
386 of ethanol. Samples were dried at the critical point, using a CO<sub>2</sub> drier (Tousimis, Rockville MD),  
387 mounted onto an aluminum stub, and sputter coated with 80/20 gold-palladium. A thin strip of  
388 colloidal silver was painted at the sample edge to dissipate sample charging. Samples were imaged  
389 with an FEI Quanta 250 field-emission gun scanning electron microscope. Quantification of



390 macrophages producing extracellular traps was determined by evaluating scanning electron  
391 micrograph images at 750X magnification and counting total macrophages and those macrophages  
392 releasing extracellular traps. Extracellular traps were defined as previously described with typical  
393 appearing fibers extending from the cell body into the extracellular space (36).

394  
395 **Confocal Laser Scanning Microscopy:** Co-cultures were completed and macrophages fixed as  
396 above. Coverslips were washed once with PBS prior to staining with SYTOX® Green (10 µM final  
397 concentration, ThermoFisher) for double stranded DNA (dsDNA), and Hoechst 33342 (5 µM final  
398 concentration, ThermoFisher) for condensed chromatin (nuclei). Additional staining for histones and  
399 MMPs were accomplished by blocking cells in 1% bovine serum albumin in PBS for 30 minutes at  
400 37°C followed by a 1 hour incubation at 37°C with antibodies for histone H3 (ab5103, abcam,  
401 Cambridge, MA), neutrophil elastase (ab68672, abcam), myeloperoxidase (ab9535, abcam), matrix  
402 metalloproteinase (MMP)-1 (ab551168, abcam), MMP-7 (ab5706, abcam), MMP-8 (ab81286,  
403 abcam), MMP-9 (ab38898, abcam), or MMP-12 (ab137444, abcam). Cells were then washed 3 times  
404 with 1% BSA in PBS followed by a 30 minute incubation with an Alexa-594 conjugated goat anti-  
405 rabbit secondary antibody (ThermoFisher) and 2 additional washes with 1% BSA in PBS prior to  
406 mounting coverslips onto glass microscope slides with Aqua Poly/Mount (Polysciences Inc,  
407 Warrington PA). Macrophages were visualized with a Zeiss LSM 710 META Inverted Laser Scanning  
408 Confocal Microscope, and extracellular traps were identified by dsDNA staining that extended into the  
409 extracellular environment.

410  
411 **Bacterial killing by macrophages releasing extracellular traps:** PMs were infected with GBS cells  
412 at an MOI of 20:1 as described above. As indicated some PMs were incubated with 100 U/mL DNase  
413 I during infection to degrade extracellular trap structures as has been described previously (37). At  
414 the end of 1 hour, DNase I was added to previously untreated wells for 10 minutes to release trapped  
415 bacterial cells. Supernatants were collected and PMs were permeabilized with 0.05% Tween-20 in



sterile ice-cold water to release intracellular bacteria. Samples were vortexed vigorously, serially diluted, and plated on blood agar plates to enumerate bacterial cells. Untreated PMs were compared to DNase I treated cells and data are expressed as the percent colony forming units (CFU) recovered compared to untreated cells. To further evaluate bacterial killing, PMs were seeded onto coverslips and infected as above. Following infection, cells were stained using the Live/Dead BacLight Bacterial Viability Kit (Invitrogen) prior to confocal laser scanning microscopy.

**LDH cytotoxicity assay:** Placental macrophages were incubated in RPMI media without antibiotics or serum and infected as above. Supernatants were collected and centrifuged to pellet cellular debris. Supernatants were analyzed using the Cytotoxicity Detection Kit (Sigma-Aldrich) per manufacturer instructions. Results are expressed as percent toxicity using media without cells as the low control and cells treated with 2% Triton X as a high control. Percent cytotoxicity was calculated using the following equation:  $\text{cytotoxicity (\%)} = (\text{experimental value} - \text{low control}) / (\text{high control} - \text{low control}) \times 100$ .

**Apoptosis Assay:** Placental macrophages were incubated in RPMI media without antibiotics and infected as above. Following infection supernatants were removed and cells were fixed with 2.0% paraformaldehyde and 2.5% glutaraldehyde in 0.05 M sodium cacodylate buffer for at least 15 minutes. Click-iT Plus TUNEL Assay with Alexa-Fluor 594 dye (ThermoFisher) was used to identify cells undergoing apoptosis and staining was conducted per manufacturer instructions with additional staining that included Hoechst 33342 to visualize nuclei prior to confocal laser scanning microscopy.

**Macrophage viability assay:** To determine if DNase I treatment resulted in alterations in PM viability or function, TNF- $\alpha$  release was used a functional measure. Cells were left untreated or treated with 100 U/mL DNase I for 60 minutes. All cells were then washed and fresh media added prior to stimulation with 150:1 heat-killed GBS cells (incubated at 42°C for 2 hours) for 24 hours.

441 Supernatants were collected and centrifuged to pellet cellular debris before TNF-  $\alpha$  release was  
442 determined using a DuoSet TNF-  $\alpha$  ELISA (R&D Systems) per manufacturer instructions.

443  
444 **Measurement of intracellular ROS production:** Measurements of intracellular ROS production was  
445 made by staining cells with CellRox® Deep Red Reagent (ThermoFisher) which measures oxidative  
446 stress by producing fluorescence upon oxidation by ROS. PMs were isolated and treated as  
447 described above. At the time of infection, a cellular stain mixture containing CellROX Deep Red (5  $\mu$ M  
448 final concentration), SYTOX GREEN, and Hoechst 33342 was added to co-cultures. After 1 hour of  
449 infection, cells were washed 3 times with PBS before a 15-minute fixation with 3.7% formaldehyde to  
450 preserve CellRox Reagent signal. Coverslips were then mounted onto glass slides and visualized  
451 with a visualized with a Zeiss LSM 710 confocal microscope as above. Images obtained were  
452 analyzed using Fiji Version 1.0 (94). In order to quantify ROS production, a cellular ROS production  
453 index was calculated using the following equation:  $((\text{total image intensity} - (\text{mean background}$   
454  $\text{fluorescence} \times \text{image area}))/\text{total macrophages counted}) \times (\text{number of macrophages with ROS}$   
455  $\text{production}/\text{total macrophages counted})$ . Images capturing only ROS staining (without other  
456 stains/channels) were measured to determine the total corrected fluorescence for the total image  
457 area. Mean background fluorescence was determined by at least 3 different measurements in areas  
458 of the image lacking cellular contents (95). Data are presented as the mean  $\pm$  SE ROS cellular  
459 production index of 10 images per sample.

460  
461 **Metalloproteinase ELISA:** Supernatants from macrophage-GBS co-cultures were collected and  
462 centrifuged as above to remove cellular debris. Supernatants were then evaluated for the  
463 concentration of human MMP-8 and MMP-9 using DuoSet ELISA kits (R&D Systems, Minneapolis,  
464 MN) per the manufacturer's protocol and protein levels were calculated from a standard curve.

465  
466 **Matrix metalloproteinase activity:** MMP activity of co-culture supernatants was measured using the

467 MMP Activity Assay Kit (abcam). Supernatants were incubated with assay buffer for 30 minutes and  
468 fluorescence signal was measured with a fluorescence microplate reader at an Ex/Em = 490/525 nm.  
469 Sample values were normalized to uninfected cells from the same placental sample to calculate a  
470 percent change for each placental sample assayed.

471 **Human fetal membrane infections:** Fetal membrane tissue was obtained and cultured as previously  
472 described (96). Briefly, fetal membranes were excised from placental tissues. Fetal membrane tissue  
473 sections were suspended over a 12 mm Transwell Permeable Support without membrane (Corning)  
474 and immobilized using a ¼ inch intraoral elastic band (Ormco, Orange CA) so that the choriodecidua  
475 was oriented facing up. Both transwell chambers were incubated with Dulbecco's modified Eagle's  
476 medium (DMEM), high-glucose, HEPES, no-phenol-red cell culture medium (Gibco, Carlsbad,  
477 California) supplemented with 1% fetal bovine serum and PEN-STREP antibiotic/antimycotic mixture  
478 (Gibco). Transwells were incubated overnight at 37°C in ambient air containing 5% CO<sub>2</sub> before media  
479 was replaced with DMEM, high-glucose, HEPES, no-phenol-red cell culture medium (lacking the  
480 PEN-STREP antibiotic/antimycotic mixture). Bacterial cells were added to the choriodecidual surface  
481 of the gestational membranes at a multiplicity of infection of  $1 \times 10^6$  cells per transwell. Co-cultures  
482 were incubated at 37°C in ambient air containing 5% CO<sub>2</sub> for 48 hours at which time membrane  
483 tissues were fixed in 10% neutral buffered formalin prior to paraffin embedding.

484 **Human fetal membrane immunohistochemistry staining:** Tissues were cut to 5 µm sections and  
485 multiple sections were placed on each slide for analysis. For immunohistochemistry, slides were  
486 deparaffinized and heat induced antigen retrieval was performed on the Bond Max automated IHC  
487 stainer (Leica Biosystems, Buffalo Grove IL) using their Epitope Retrieval 2 solution for 5-20 minutes.  
488 Slides were incubated with a rabbit polyclonal anti-GBS antibody (abcam, ab78846), rabbit polyclonal  
489 anti-histone H3 antibody (abcam, ab8580), or a mouse monoclonal anti-CD163 antibody (MRQ-26,  
490 Cell Marque, Rocklin CA) for 1 hour. The Bond Polymer Refine detection system (Leica Biosystems)

491 was used for visualization. Slides were the dehydrated, cleared and coverslipped before light  
492 microscopy analysis was performed.

493 **Human fetal membrane immunofluorescence staining:** For immunofluorescence evaluation of  
494 METs within fetal membrane tissue, tissues were fixed and sectioned as above. Sections were briefly  
495 incubated with xylene to deparaffinize. Tissues were blocked for greater than 1 hour with 10% bovine  
496 serum albumins (Sigma-Aldrich) before staining with 1/100 dilutions of mouse monoclonal anti-H3  
497 antibodies conjugated with Alexa Fluor® 647 (ab205729, abcam), rabbit monoclonal anti-CD163  
498 antibodies conjugated with Alexa Fluor® 488 (ab218293, abcam), and mouse monoclonal anti-MMP-  
499 9 antibodies conjugated with Alexa Fluor® 405 (NBP-259699AF405, Novus biological, Littleton CO)  
500 overnight at room temperature. Additional tissues staining were conducted as previously described  
501 (45). Tissues were deparaffinized and then incubated in R universal Epitope Recovery Buffer  
502 (Electron Microscopy Sciences, Hatfield PA) at 50°C for 90 minutes. Samples were then rinsed in  
503 deionized water three times followed by washing with TRIS-buffered saline (TBS, pH 7.4). Samples  
504 were permeablized for 5 minutes with 0.5% Triton X100 in TBS at room temperature followed by 3  
505 washes with TBS. Samples were then blocked with TBS with 10% BSA for 30 minutes prior to  
506 incubation with 1:50 dilutions of rabbit poly-colonal anti-neutrophil elastase antibodies (481001,  
507 MilliporeSigma, Burlington MA) and mouse monoclonal anti-H3 antibodies conjugated with Alexa  
508 Fluor® 647 in blocking buffer at room temperature overnight. The following day, samples were  
509 washed in TBS followed by repeat blocking with blocking buffer for 30 minutes at room temperature  
510 before incubation with 1/00 dilution of Alexa Fluor® 488 conjugated donkey anti-rabbit IgG  
511 (Invitrogen) for 4 hours at room temperature. Samples were then washed and incubated with 5 µM  
512 Hoechst 33342 for 30 minutes to stain nuclei. After final washes, slides were dried and coverslipped.  
513 Tissues were visualized with a Zeiss LSM 710 META Inverted Laser Scanning Confocal Microscope.  
514 Images shown are representative of 4 separate experiments using tissues from different placental  
515 samples.

516 **Statistics:** Statistical analysis of MET quantifications was performed using one-way ANOVA with  
517 either Tukey's or Dunnet's post-hoc correction for multiple comparisons and all reported *p* values are  
518 adjusted to account for multiple comparisons. MMP activities assays and bacterial killing assay were  
519 normalized to untreated or uninfected cells and analyzed with Student's *t*-test or one-way ANOVA. *p*  
520 values  $\leq 0.05$  were considered significant. All data analyzed in this work were derived from at least  
521 three biological replicates (representing different placental samples). Statistical analyses were  
522 performed using GraphPad Prism 6 for MAC OS X Software (Version 6.0g, GraphPad Software Inc.,  
523 La Jolla CA).

524  
525 **Acknowledgments:** The authors thank Dr. Oscar Gomez-Duarte and Dr. Shannon Manning for  
526 providing the clinical bacterial isolates used in this study. The funders of this study had no role in  
527 study design, data collection and interpretation, or the decision to submit the work for publication. The  
528 authors have no conflicts of interest to disclose. Core Services including use of the Cell Imaging  
529 Shared Resource were performed through support from Vanderbilt Institute for Clinical and  
530 Translational Research program supported by the National Center for Research Resources, Grant  
531 UL1 RR024975-01, and the National Center for Advancing Translational Sciences, Grant 2 UL1  
532 TR000445-06. De-identified, human fetal membrane tissue samples were provided by the  
533 Cooperative Human Tissue Network at Vanderbilt University, which is funded by the National Cancer  
534 Institute.

536 Figure 1: Placental macrophages infected *ex vivo* with GBS release extracellular traps capable of  
537 killing GBS cells. 1A: Placental macrophages were infected for 1 hour with GBS cells at an MOI of  
538 20:1. Scanning electron micrographs (bottom row) demonstrate extracellular structures released from  
539 macrophages (white arrows), which are not seen after DNase I treatment. PMs were also stained with  
540 Sytox Green, a double stranded DNA dye, and evaluated by scanning laser confocal microscopy,  
541 which demonstrates extracellular structures composed of DNA (white arrows). Measurement bars  
542 represent 100  $\mu\text{m}$ . 1B: Placental macrophage extracellular traps were stained with Hoechst 33342  
543 (blue), a condensed chromatin/nuclear stain, SYTOX Green (green), and specific antibodies for either  
544 histone H3, myeloperoxidase or neutrophil elastase as listed (red). Histone, myeloperoxidase and  
545 neutrophil elastase staining co-localizes to extracellular DNA staining suggesting that MET structures  
546 contain these proteins. Measurement bars represent 100  $\mu\text{m}$ . 1C: PMs releasing METs were  
547 quantified by counting MET producing cells seen in SEM images and expressed as the number of  
548 macrophages releasing METs per field. GBS infected PMs release significantly more METs than  
549 uninfected cells, and DNase I treatment degraded these structures. Data represent samples from 6-8  
550 different placental samples, one-way ANOVA,  $F = 32.7$ ,  $p < 0.0001$ , with post hoc Tukey's multiple  
551 comparison test. 1D: Placental macrophage METs kill GBS cells. PMs were infected for 1 hour at  
552 MOI 20:1 in the presence of DNase I to degrade METs or without (Untreated). Untreated wells were  
553 treated with DNase I for the last 10 minutes of infection to break up DNA complexes prior to serial  
554 dilution and plating. DNase I treatment significantly impairs bactericidal activity. Data represent the  
555 percent recovered colony forming units (CFU), normalized to untreated cells from 7 separate  
556 experiments from different placenta samples, Student's  $t$  test,  $t = 3.224$ ,  $df = 6$ ,  $p = 0.0180$ . \*\*\*\*  
557 represents  $p \leq 0.0001$ , \* represents  $p \leq 0.05$ .

558  
559 Figure 2: MET release from placental macrophages requires ROS generation. Placental  
560 macrophages were incubated with DNase I, DPI to inhibit ROS generation, or cytochalasin D to  
561 prevent actin polymerization and then infected with GBS at an MOI of 20:1 for 1 hour. Uninfected

562 cells were also stimulated with 500 nM PMA to stimulate protein kinase C activation. 2A: Cells were  
563 then imaged to identify MET release by confocal microscopy after staining with SYTOX green (top  
564 row) or via SEM (bottom row). Measurement bars represent 100  $\mu$ m. 2B: MET release was then  
565 quantified as in Figure 1. Treatment with DPI and cytochalasin D significantly inhibited MET release,  
566 whereas MET release from PMA stimulated uninfected cells was not different from GBS infected  
567 cells. Data represent mean  $\pm$  SE percent of cells releasing METs per field of 3-9 separate  
568 experiments, one-way ANOVA,  $F = 21.1$ ,  $p < 0.0001$  with Tukey's multiple comparison test. 2C, D:  
569 PM cell infections were repeated with staining for intracellular ROS production using CellROX deep  
570 red reagent. This reagent becomes fluorescent when oxidized by ROS. Cells were co-cultured with  
571 GBS cells as above and stained with CellROX deep red, SYTOX green, and Hoechst (2D top row).  
572 Measurement bars represent 100  $\mu$ m. ROS production was quantified by measuring the total red  
573 fluorescence per image (2D, bottom row) and the cellular ROS production index was calculated (2C).  
574 Data are shown from a representative experiment of 3 independent experiments and are expressed  
575 as the mean cellular ROS production index  $\pm$  SE of 10 images from a single placental sample. GBS  
576 infected and PMA stimulated uninfected cells generated significantly higher amounts of ROS than  
577 uninfected cells or those treated with DPI or cytochalasin D (one-way ANOVA,  $F = 16.5$ ,  $p < 0.0001$   
578 with post hoc Tukey's multiple comparison test). \*\*\*\* represents  $p \leq 0.0001$ , \*\*\* represents  $p \leq 0.001$ ,  
579 \*\* represents  $p \leq 0.01$ , \* represents  $p \leq 0.05$ .

580  
581 Figure 3: GBS infection results in release of matrix metalloproteinases (MMPs) from placental  
582 macrophages. 3A: PM METs contain MMP-1,- 7, -8, -9, and -12. PMs were infected as above and  
583 then fixed and stained with anti-MMP antibodies and an Alexa Fluor-conjugated secondary antibody  
584 (red), Hoechst 33342, and SYTOX green. METs (white arrows) stained strongly for MMPs.  
585 Measurement bars represent 100  $\mu$ m. 3B, C: Supernatant from PM-GBS co-cultures were collected  
586 and evaluated for MMP-8 (3B) and MMP-9 (3C) concentrations by ELISA. GBS infection results in a  
587 significant increase in MMP-8 (Student's  $t$  test,  $t = 3.599$ ,  $df = 7$ ,  $p = 0.0087$ ) and MMP-9 (Student's  $t$



588 test,  $t = 3.160$ ,  $df = 10$ ,  $p = 0.0102$ ) release compared to uninfected cells. 3D: PMs release active  
589 MMPs in response to GBS. Supernatant from PM-GBS co-culture was evaluated for MMP activity  
590 using a MMP Activity Assay to assess global MMP activity within co-culture supernatants.  
591 Supernatant from GBS infected cells had 53% more MMP activity compared to uninfected PMs  
592 (Student's  $t$  test,  $t = 2.439$ ,  $df = 11$ ,  $p = 0.0329$ ).

593  
594 Figure 4: Identification of MET-like structures within human fetal membrane tissues infected with GBS  
595 *ex vivo*. Fetal membrane tissues were excised from healthy, term placental tissues from women  
596 undergoing routine cesarean section. Fetal membrane tissues were then infected with GBS on the  
597 choriondecidual surface for 48 hours prior to fixation and immunohistochemistry (4A) or confocal  
598 microscopy (4B). 4A: Fetal membrane tissues were stained with hematoxylin and eosin (far left) and  
599 representative images are shown at 4X magnification. Area within the red box is shown in sections  
600 stained with anti-GBS, anti-CD163, or anti-histone H3 antibodies and visualized by  
601 immunohistochemistry. GBS cells are able to invade from the choriondecidual surface (CD) toward the  
602 amnion epithelium (AE). Macrophages are shown in the area of GBS infection and macrophages with  
603 extracellular histone staining (far right, 40X insert) are demonstrated in an area that is also staining  
604 with the macrophage marker CD163 (red boxes). Measurement bars represent 100  $\mu\text{m}$ . 4B: Fixed  
605 and paraffin embedded fetal membranes were stained with conjugated primary antibodies against  
606 CD163, histone H3, and MMP-9. CD163-positive cells within the membrane tissue are seen extruding  
607 contents that stain positive for histones and MMP-9 consistent with METs (white arrows).  
608 Measurement bar represents 20  $\mu\text{m}$ .

609  
610 Figure S1: Staining controls for MET content evaluation. Placental macrophages were treated as in  
611 Figure 1B, but were either stained without a primary antibody (top row) or with an isotype control  
612 fluorophore-conjugated secondary antibody. Negligible myeloperoxidase (MPO) staining was



513 identified in these samples compared to Figure 1B (middle row) confirming the specificity of the  
514 staining protocol. Measurement bars represent 100  $\mu\text{m}$ .

515  
516 Figure S2: GBS infection of PMs results in release of METs capable of killing GBS. S2A: PMs release  
517 METs in a dose dependent response. PMs were infected for one hour at increasing MOI as indicated  
518 or treated with vehicle control (PBS) (one-way ANOVA,  $F = 12.3$ ,  $p = 0.0076$  with post hoc Tukey's  
519 multiple comparison test). S2B: DNase I treatment does not alter PM viability. PMs were either  
520 treated with DNase I or left untreated for one hour before cells were washed and stimulated with heat-  
521 killed GBS cells (MOI 150:1) or left unstimulated for 24 hours. Supernatants were assessed for TNF- $\alpha$   
522 release by ELISA as a measure of viability. Treatment of PMs with DNase I did not have a significant  
523 effect on TNF- $\alpha$  release (one-way ANOVA,  $F = 7.75$ ,  $p = 0.0016$  with post hoc Tukey's multiple  
524 comparison test). S2C: PM METs are capable of killing GBS cells. PM co-cultures were stained with  
525 live-dead bacterial staining including Syto9 and propidium iodide. Both dyes stain DNA but propidium  
526 iodide (red) is excluded from live cells. Dead GBS cells (red) are shown in close proximity to MET  
527 fibers (white arrows). Measurement bar represents 50  $\mu\text{m}$ .

528  
529 Figure S3: Placental macrophages release extracellular traps in response to different GBS strains as  
530 well as *E. coli* cells. S3A: Placental macrophages were co-cultured with live GBS strain GB037, *E.*  
531 *coli* cells, or heat killed GBS or *E. coli* cells at an MOI of 20:1 for 1 hour. Cells were pretreated with  
532 DNase I as indicated. Cells were then fixed and subsequently stained with SYTOX Green and  
533 evaluated for MET release by confocal microscopy. Measurement bars represent 100  $\mu\text{m}$ . S3B:  
534 Placental macrophages releasing METs were quantified by counting MET producing cells from SEM  
535 images (not shown) and expressed as the number of macrophages releasing METs per field. At 1  
536 hour of infection live GB037, heat killed GB590 (GBS), and live or dead *E. coli* stimulated MET  
537 release as DNase I treatment significantly reduced the number of extracellular structures (unpaired  $t$ -

538 test of similar treated groups of at least 3 separate experiments from separate placental samples). \*\*\*  
539 represents  $p \leq 0.001$ , \*\* represents  $p \leq 0.01$ , \* represents  $p \leq 0.05$ .  
540  
541 Figure S4: GBS infection results in PM cell death but not pyroptosis or apoptosis at 1 hour of  
542 infection. PMs were isolated and co-cultured with GBS as in Figure 1. S4A: Following 1 hour of  
543 infection, co-culture supernatants were assayed for LDH release and percent cytotoxicity was  
544 calculated. GBS infection results in a significant increase in cell death (two-tailed, paired Student's  $t$   
545 test,  $t = 4.13$ ,  $df = 4$ ,  $p = 0.0145$ ). S4B: GBS infection does not result in significant PM pyroptosis at 1  
546 hour. Following infection as above, co-culture supernatants were assessed for IL-1 $\beta$  release by  
547 ELISA. GBS infection does not result in significant IL-1 $\beta$  release (two-tailed Student's  $t$  test,  $t =$   
548  $0.08945$ ,  $df = 11$ ,  $p = 0.9303$ ). S4C,D: Following infection as above, PMs underwent TUNEL staining  
549 to evaluate cells for apoptotic changes. S4C: Representative confocal images demonstrate nuclear  
550 staining (blue) and TUNEL positive cells (red, bottom row). Permeabilized, DNase I treated cells are  
551 shown as a positive control. S4D: Quantification of TUNEL positive cells. One hour of GBS infection  
552 does not result in an increase in TUNEL positive PMs (two-tailed, paired Student's  $t$  test,  $t = 1.056$ ,  $df$   
553  $= 2$ ,  $p = 0.4017$ ).  
554  
555 Figure S5: PMA activated THP-1 macrophage-like cells release METs in response to GBS. S5A:  
556 THP-1 cells were incubated with 100 nM PMA for 24 hours prior to infection to induce differentiation  
557 to macrophage-like cells. Cells were infected with GBS at an MOI of 20:1 for 1 hour. As indicated,  
558 cells were pre-incubated with DNase I, cytochalasin D, nocodazole, or exposed to 10% volume of  
559 sterile filtered bacterial supernatant from GBS cultures grown overnight to steady state. After  
560 infection, cells were fixed and evaluated by confocal microscopy after staining with SYTOX Green  
561 (top) or by SEM (bottom). White arrows denote METs. Measurement bars represent 100  $\mu\text{m}$ . S5B:  
562 Macrophages releasing METs were quantified by counting MET producing cells seen in SEM images  
563 and expressed as the number of macrophages releasing METs per field. Data represent mean

percent of cells releasing METs per field of 3 separate experiments, one-way ANOVA,  $F = 8.08$ ,  $p = 0.028$  with Dunnett's multiple comparison test with samples compared to GBS infected. \* represents  $p < 0.05$ , \*\* represents  $p < 0.01$ .

Figure S6: MET-like structures containing neutrophil elastase are seen in human fetal membrane tissues infected *ex vivo* with GBS. Human fetal membrane tissues were isolated and infected as in Figure 4 and then stained for neutrophil elastase (green), histones (red), or DNA/chromatin (blue). Neutrophil elastase positive cells were identified in the choriodecidua (CD) (top panel). The area in the red box was then evaluated at higher magnification and elongated structures of neutrophil elastase that co-localized with staining for histones and DNA consistent with METs were identified (white arrows). This staining pattern contrasts with staining of intact cells where neutrophil elastase staining was isolated to granule structures that did not localize to histone or DNA staining (yellow arrow). Measurement bars represent 20  $\mu\text{m}$ .

579 Bibliography

- 580 1. Blencowe H, Cousens S, Chou D, Oestergaard M, Say L, Moller AB, Kinney M, Lawn J, Born  
581 Too Soon Preterm Birth Action G. 2013. Born too soon: the global epidemiology of 15 million  
582 preterm births. *Reprod Health* 10 Suppl 1:S2.
- 583 2. March of Dimes. 10/2013 2013. Permaternity Campaign, *on* March of Dimes.  
584 <http://www.marchofdimes.org/mission/the-economic-and-societal-costs.aspx>. Accessed  
585 1/21/2015.
- 586 3. WHO. 2012. Born Too Soon: The Global Action Report in Preterm Birth.
- 587 4. Organization WH. November 2016 2016. Preterm Birth: Fact Sheet, *on* WHO 2017.  
588 <http://www.who.int/mediacentre/factsheets/fs363/en/>. Accessed 9/26/2017.
- 589 5. Liu L, Oza S, Hogan D, Chu Y, Perin J, Zhu J, Lawn JE, Cousens S, Mathers C, Black RE.  
590 2016. Global, regional, and national causes of under-5 mortality in 2000-15: an updated  
591 systematic analysis with implications for the Sustainable Development Goals. *Lancet*  
592 388:3027-3035.
- 593 6. Luu TM, Rehman Mian MO, Nuyt AM. 2017. Long-Term Impact of Preterm Birth:  
594 Neurodevelopmental and Physical Health Outcomes. *Clin Perinatol* 44:305-314.
- 595 7. Doyle LW. 2008. Cardiopulmonary outcomes of extreme prematurity. *Semin Perinatol* 32:28-  
596 34.
- 597 8. Mendz GL, Kaakoush NO, Quinlivan JA. 2013. Bacterial aetiological agents of intra-amniotic  
598 infections and preterm birth in pregnant women. *Front Cell Infect Microbiol* 3:58.
- 599 9. Kwatra G, Adrian PV, Shiri T, Buchmann EJ, Cutland CL, Madhi SA. 2014. Serotype-specific  
700 acquisition and loss of group B streptococcus recto-vaginal colonization in late pregnancy.  
701 *PLoS One* 9:e98778.
- 702 10. Russell NJ, Seale AC, O'Driscoll M, O'Sullivan C, Bianchi-Jassir F, Gonzalez-Guarin J, Lawn  
703 JE, Baker CJ, Bartlett L, Cutland C, Gravett MG, Heath PT, Le Doare K, Madhi SA, Rubens  
704 CE, Schrag S, Sobanjo-Ter Meulen A, Vekemans J, Saha SK, Ip M, Group GBSMCI. 2017.

- 705 Maternal Colonization With Group B Streptococcus and Serotype Distribution Worldwide:  
706 Systematic Review and Meta-analyses. Clin Infect Dis 65:S100-S111.
- 707 11. Benitz WE, Gould JB, Druzin ML. 1999. Risk factors for early-onset group B streptococcal  
708 sepsis: estimation of odds ratios by critical literature review. Pediatrics 103:e77.
- 709 12. Seale AC, Blencowe H, Bianchi-Jassir F, Embleton N, Bassat Q, Ordi J, Menendez C, Cutland  
710 C, Briner C, Berkley JA, Lawn JE, Baker CJ, Bartlett L, Gravett MG, Heath PT, Ip M, Le Doare  
711 K, Rubens CE, Saha SK, Schrag S, Meulen AS, Vekemans J, Madhi SA. 2017. Stillbirth With  
712 Group B Streptococcus Disease Worldwide: Systematic Review and Meta-analyses. Clin Infect  
713 Dis 65:S125-S132.
- 714 13. Bianchi-Jassir F, Seale AC, Kohli-Lynch M, Lawn JE, Baker CJ, Bartlett L, Cutland C, Gravett  
715 MG, Heath PT, Ip M, Le Doare K, Madhi SA, Saha SK, Schrag S, Sobanjo-Ter Meulen A,  
716 Vekemans J, Rubens CE. 2017. Preterm Birth Associated With Group B Streptococcus  
717 Maternal Colonization Worldwide: Systematic Review and Meta-analyses. Clin Infect Dis  
718 65:S133-S142.
- 719 14. Verani JR, McGee L, Schrag SJ, Division of Bacterial Diseases NCfl, Respiratory Diseases  
720 CfDC, Prevention. 2010. Prevention of perinatal group B streptococcal disease--revised  
721 guidelines from CDC, 2010. MMWR Recomm Rep 59:1-36.
- 722 15. BJ S, NI H, PJ S, RG F, BB P, KP VM, MJ B, RN G, ID F, EC H, S S, K K, WA C, KL W, EF B,  
723 MC W, K S, AR L, AL S, SJ S, A D, RD H. 2011. Early Onset Neonatal Sepsis: The Burden of  
724 Group B Streptococcal and E. coli Disease Continues. Pediatrics 127:817-826.
- 725 16. Ghaebi M, Nouri M, Ghasemzadeh A, Farzadi L, Jadidi-Niaragh F, Ahmadi M, Yousefi M.  
726 2017. Immune regulatory network in successful pregnancy and reproductive failures. Biomed  
727 Pharmacother 88:61-73.
- 728 17. Arck PC, Hecher K. 2013. Fetomaternal immune cross-talk and its consequences for maternal  
729 and offspring's health. Nat Med 19:548-56.

- 730 18. Xu YY, Wang SC, Li DJ, Du MR. 2017. Co-Signaling Molecules in Maternal-Fetal Immunity.  
731 Trends Mol Med 23:46-58.
- 732 19. Nagamatsu T, Barrier BF, Schust DJ. 2011. The regulation of T-cell cytokine production by  
733 ICOS-B7H2 interactions at the human fetomaternal interface. Immunol Cell Biol 89:417-25.
- 734 20. Goldenberg RL, Hauth JC, Andrews WW. 2000. Intrauterine infection and preterm delivery. N  
735 Engl J Med 342:1500-7.
- 736 21. Kim CJ, Romero R, Chaemsaihong P, Chaiyasit N, Yoon BH, Kim YM. 2015. Acute  
737 chorioamnionitis and funisitis: definition, pathologic features, and clinical significance. Am J  
738 Obstet Gynecol 213:S29-52.
- 739 22. Anders AP, Gaddy JA, Doster RS, Aronoff DM. 2017. Current concepts in maternal-fetal  
740 immunology: Recognition and response to microbial pathogens by decidual stromal cells. Am J  
741 Reprod Immunol doi:10.1111/aji.12623.
- 742 23. Stallmach T, Hebisch G, Joller H, Kolditz P, Engelmann M. 1995. Expression pattern of  
743 cytokines in the different compartments of the feto-maternal unit under various conditions.  
744 Reprod Fertil Dev 7:1573-80.
- 745 24. Agrawal V, Hirsch E. 2012. Intrauterine infection and preterm labor. Semin Fetal Neonatal Med  
746 17:12-9.
- 747 25. Houser BL. 2012. Decidual macrophages and their roles at the maternal-fetal interface. Yale J  
748 Biol Med 85:105-18.
- 749 26. Reyes L, Wolfe B, Golos T. 2017. Hofbauer Cells: Placental Macrophages of Fetal Origin.  
750 Results Probl Cell Differ 62:45-60.
- 751 27. Brown MB, von Chamier M, Allam AB, Reyes L. 2014. M1/M2 macrophage polarity in normal  
752 and complicated pregnancy. Front Immunol 5:606.
- 753 28. Zhang YH, He M, Wang Y, Liao AH. 2017. Modulators of the Balance between M1 and M2  
754 Macrophages during Pregnancy. Front Immunol 8:120.

- 755 29. Mantovani A, Biswas SK, Galdiero MR, Sica A, Locati M. 2013. Macrophage plasticity and  
756 polarization in tissue repair and remodelling. *J Pathol* 229:176-85.
- 757 30. Kim SY, Romero R, Tarca AL, Bhatti G, Kim CJ, Lee J, Elsey A, Than NG, Chaiworapongsa T,  
758 Hassan SS, Kang GH, Kim JS. 2012. Methylome of fetal and maternal monocytes and  
759 macrophages at the feto-maternal interface. *Am J Reprod Immunol* 68:8-27.
- 760 31. Gustafsson C, Mjosberg J, Matussek A, Geffers R, Matthiesen L, Berg G, Sharma S, Buer J,  
761 Ernerudh J. 2008. Gene expression profiling of human decidual macrophages: evidence for  
762 immunosuppressive phenotype. *PLoS One* 3:e2078.
- 763 32. Johnson EL, Chakraborty R. 2012. Placental Hofbauer cells limit HIV-1 replication and  
764 potentially offset mother to child transmission (MTCT) by induction of immunoregulatory  
765 cytokines. *Retrovirology* 9:101.
- 766 33. Chen CP, Tsai PS, Huang CJ. 2012. Antiinflammation effect of human placental multipotent  
767 mesenchymal stromal cells is mediated by prostaglandin E2 via a myeloid differentiation  
768 primary response gene 88-dependent pathway. *Anesthesiology* 117:568-79.
- 769 34. Montero J, Gomez-Abellan V, Arizcun M, Mulero V, Sepulcre MP. 2016. Prostaglandin E2  
770 promotes M2 polarization of macrophages via a cAMP/CREB signaling pathway and  
771 deactivates granulocytes in teleost fish. *Fish Shellfish Immunol* 55:632-41.
- 772 35. Wetzka B, Clark DE, Charnock-Jones DS, Zahradnik HP, Smith SK. 1997. Isolation of  
773 macrophages (Hofbauer cells) from human term placenta and their prostaglandin E2 and  
774 thromboxane production. *Hum Reprod* 12:847-52.
- 775 36. Doster RS, Rogers LM, Gaddy JA, Aronoff DM. 2018. Macrophage Extracellular Traps: A  
776 Scoping Review. *J Innate Immun* 10:3-13.
- 777 37. Brinkmann V, Reichard U, Goosmann C, Fauler B, Uhlemann Y, Weiss DS, Weinrauch Y,  
778 Zychlinsky A. 2004. Neutrophil extracellular traps kill bacteria. *Science* 303:1532-5.
- 779 38. Hirsch JG. 1958. Bactericidal action of histone. *J Exp Med* 108:925-44.

- 780 39. Papayannopoulos V, Metzler KD, Hakkim A, Zychlinsky A. 2010. Neutrophil elastase and  
781 myeloperoxidase regulate the formation of neutrophil extracellular traps. *J Cell Biol* 191:677-  
782 91.
- 783 40. Stoiber W, Obermayer A, Steinbacher P, Krautgartner WD. 2015. The Role of Reactive  
784 Oxygen Species (ROS) in the Formation of Extracellular Traps (ETs) in Humans. *Biomolecules*  
785 5:702-23.
- 786 41. Gomez-Lopez N, StLouis D, Lehr MA, Sanchez-Rodriguez EN, Arenas-Hernandez M. 2014.  
787 Immune cells in term and preterm labor. *Cell Mol Immunol* 11:571-81.
- 788 42. Chaemsaitong P, Romero R, Docheva N, Chaiyasit N, Bhatti G, Pacora P, Hassan SS, Yeo  
789 L, Erez O. 2018. Comparison of rapid MMP-8 and interleukin-6 point-of-care tests to identify  
790 intra-amniotic inflammation/infection and impending preterm delivery in patients with preterm  
791 labor and intact membranes(). *J Matern Fetal Neonatal Med* 31:228-244.
- 792 43. Kim KW, Romero R, Park HS, Park CW, Shim SS, Jun JK, Yoon BH. 2007. A rapid matrix  
793 metalloproteinase-8 bedside test for the detection of intraamniotic inflammation in women with  
794 preterm premature rupture of membranes. *Am J Obstet Gynecol* 197:292 e1-5.
- 795 44. Angus SR, Segel SY, Hsu CD, Locksmith GJ, Clark P, Sammel MD, Macones GA, Strauss JF,  
796 3rd, Parry S. 2001. Amniotic fluid matrix metalloproteinase-8 indicates intra-amniotic infection.  
797 *Am J Obstet Gynecol* 185:1232-8.
- 798 45. Brinkmann V, Abu Abed U, Goosmann C, Zychlinsky A. 2016. Immunodetection of NETs in  
799 Paraffin-Embedded Tissue. *Front Immunol* 7:513.
- 800 46. Simon D, Simon HU, Yousefi S. 2013. Extracellular DNA traps in allergic, infectious, and  
801 autoimmune diseases. *Allergy* 68:409-16.
- 802 47. Soderberg D, Segelmark M. 2016. Neutrophil Extracellular Traps in ANCA-Associated  
803 Vasculitis. *Front Immunol* 7:256.



- 304 48. Delgado-Rizo V, Martinez-Guzman MA, Iniguez-Gutierrez L, Garcia-Orozco A, Alvarado-  
305 Navarro A, Fafutis-Morris M. 2017. Neutrophil Extracellular Traps and Its Implications in  
306 Inflammation: An Overview. *Front Immunol* 8:81.
- 307 49. Fuchs TA, Brill A, Duerschmied D, Schatzberg D, Monestier M, Myers DD, Jr., Wroblewski SK,  
308 Wakefield TW, Hartwig JH, Wagner DD. 2010. Extracellular DNA traps promote thrombosis.  
309 *Proc Natl Acad Sci U S A* 107:15880-5.
- 310 50. Schorn C, Janko C, Krenn V, Zhao Y, Munoz LE, Schett G, Herrmann M. 2012. Bonding the  
311 foe - NETting neutrophils immobilize the pro-inflammatory monosodium urate crystals. *Front*  
312 *Immunol* 3:376.
- 313 51. Mollerherm H, von Kockritz-Blickwede M, Branitzki-Heinemann K. 2016. Antimicrobial Activity  
314 of Mast Cells: Role and Relevance of Extracellular DNA Traps. *Front Immunol* 7:265.
- 315 52. Yousefi S, Gold JA, Andina N, Lee JJ, Kelly AM, Kozlowski E, Schmid I, Straumann A,  
316 Reichenbach J, Gleich GJ, Simon HU. 2008. Catapult-like release of mitochondrial DNA by  
317 eosinophils contributes to antibacterial defense. *Nat Med* 14:949-53.
- 318 53. Morshed M, Hlushchuk R, Simon D, Walls AF, Obata-Ninomiya K, Karasuyama H, Djonov V,  
319 Eggel A, Kaufmann T, Simon HU, Yousefi S. 2014. NADPH oxidase-independent formation of  
320 extracellular DNA traps by basophils. *J Immunol* 192:5314-23.
- 321 54. von Kockritz-Blickwede M, Goldmann O, Thulin P, Heinemann K, Norrby-Teglund A, Rohde M,  
322 Medina E. 2008. Phagocytosis-independent antimicrobial activity of mast cells by means of  
323 extracellular trap formation. *Blood* 111:3070-80.
- 324 55. Vega VL, Crotty Alexander LE, Charles W, Hwang JH, Nizet V, De Maio A. 2014. Activation of  
325 the stress response in macrophages alters the M1/M2 balance by enhancing bacterial killing  
326 and IL-10 expression. *J Mol Med (Berl)* 92:1305-17.
- 327 56. Carlin AF, Uchiyama S, Chang YC, Lewis AL, Nizet V, Varki A. 2009. Molecular mimicry of  
328 host sialylated glycans allows a bacterial pathogen to engage neutrophil Siglec-9 and dampen  
329 the innate immune response. *Blood* 113:3333-6.

- 330 57. O'Sullivan KM, Lo CY, Summers SA, Elgass KD, McMillan PJ, Longano A, Ford SL, Gan PY,  
331 Kerr PG, Kitching AR, Holdsworth SR. 2015. Renal participation of myeloperoxidase in  
332 antineutrophil cytoplasmic antibody (ANCA)-associated glomerulonephritis. *Kidney Int*  
333 88:1030-46.
- 334 58. Sharma R, O'Sullivan KM, Holdsworth SR, Bardin PG, King PT. 2017. Visualizing Macrophage  
335 Extracellular Traps Using Confocal Microscopy. *J Vis Exp* doi:10.3791/56459.
- 336 59. Halder LD, Abdelfatah MA, Jo EA, Jacobsen ID, Westermann M, Beyersdorf N, Lorkowski S,  
337 Zipfel PF, Skerka C. 2016. Factor H Binds to Extracellular DNA Traps Released from Human  
338 Blood Monocytes in Response to *Candida albicans*. *Front Immunol* 7:671.
- 339 60. Je S, Quan H, Yoon Y, Na Y, Kim BJ, Seok SH. 2016. *Mycobacterium massiliense* Induces  
340 Macrophage Extracellular Traps with Facilitating Bacterial Growth. *PLoS One* 11:e0155685.
- 341 61. Aulik NA, Hellenbrand KM, Czuprynski CJ. 2012. *Mannheimia haemolytica* and its leukotoxin  
342 cause macrophage extracellular trap formation by bovine macrophages. *Infect Immun*  
343 80:1923-33.
- 344 62. Hellenbrand KM, Forsythe KM, Rivera-Rivas JJ, Czuprynski CJ, Aulik NA. 2013. *Histophilus*  
345 *somni* causes extracellular trap formation by bovine neutrophils and macrophages. *Microb*  
346 *Pathog* 54:67-75.
- 347 63. Perez D, Munoz MC, Molina JM, Munoz-Caro T, Silva LM, Taubert A, Hermosilla C, Ruiz A.  
348 2016. *Eimeria ninakohlyakimovae* induces NADPH oxidase-dependent monocyte extracellular  
349 trap formation and upregulates IL-12 and TNF-alpha, IL-6 and CCL2 gene transcription. *Vet*  
350 *Parasitol* 227:143-50.
- 351 64. Munoz-Caro T, Silva LM, Ritter C, Taubert A, Hermosilla C. 2014. *Besnoitia besnoiti*  
352 tachyzoites induce monocyte extracellular trap formation. *Parasitol Res* 113:4189-97.
- 353 65. King PT, Sharma R, O'Sullivan K, Selemidis S, Lim S, Radhakrishna N, Lo C, Prasad J,  
354 Callaghan J, McLaughlin P, Farmer M, Steinfert D, Jennings B, Ngui J, Broughton BR, Thomas  
355 B, Essilfie AT, Hickey M, Holmes PW, Hansbro P, Bardin PG, Holdsworth SR. 2015.

- 356 Nontypeable *Haemophilus influenzae* induces sustained lung oxidative stress and protease  
357 expression. *PLoS One* 10:e0120371.
- 358 66. Chow OA, von Kockritz-Blickwede M, Bright AT, Hensler ME, Zinkernagel AS, Cogen AL,  
359 Gallo RL, Monestier M, Wang Y, Glass CK, Nizet V. 2010. Statins enhance formation of  
360 phagocyte extracellular traps. *Cell Host Microbe* 8:445-54.
- 361 67. Whidbey C, Vornhagen J, Gendrin C, Boldenow E, Samson JM, Doering K, Ngo L, Ezekwe  
362 EA, Jr., Gundlach JH, Elovitz MA, Liggitt D, Duncan JA, Adams Waldorf KM, Rajagopal L.  
363 2015. A streptococcal lipid toxin induces membrane permeabilization and pyroptosis leading to  
364 fetal injury. *EMBO Mol Med* doi:10.15252/emmm.201404883.
- 365 68. Fettucciari K, Rosati E, Scaringi L, Cornacchione P, Migliorati G, Sabatini R, Fettriconi I, Rossi  
366 R, Marconi P. 2000. Group B *Streptococcus* induces apoptosis in macrophages. *J Immunol*  
367 165:3923-33.
- 368 69. Liu P, Wu X, Liao C, Liu X, Du J, Shi H, Wang X, Bai X, Peng P, Yu L, Wang F, Zhao Y, Liu M.  
369 2014. *Escherichia coli* and *Candida albicans* induced macrophage extracellular trap-like  
370 structures with limited microbicidal activity. *PLoS One* 9:e90042.
- 371 70. Jerjomiceva N, Seri H, Vollger L, Wang Y, Zeitouni N, Naim HY, von Kockritz-Blickwede M.  
372 2014. Enrofloxacin enhances the formation of neutrophil extracellular traps in bovine  
373 granulocytes. *J Innate Immun* 6:706-12.
- 374 71. Neeli I, Dwivedi N, Khan S, Radic M. 2009. Regulation of extracellular chromatin release from  
375 neutrophils. *J Innate Immun* 1:194-201.
- 376 72. Touyz RM, Yao G, Quinn MT, Pagano PJ, Schiffrin EL. 2005. p47phox associates with the  
377 cytoskeleton through cortactin in human vascular smooth muscle cells: role in NAD(P)H  
378 oxidase regulation by angiotensin II. *Arterioscler Thromb Vasc Biol* 25:512-8.
- 379 73. Shao D, Segal AW, Dekker LV. 2010. Subcellular localisation of the p40phox component of  
380 NADPH oxidase involves direct interactions between the Phox homology domain and F-actin.  
381 *Int J Biochem Cell Biol* 42:1736-43.

- 382 74. Voloshina EV, Prasol EA, Grachev SV, Prokhorenko IR. 2009. Effect of cytochalasin D on the  
383 respiratory burst of primed neutrophils activated with a secondary stimulus. *Dokl Biochem*  
384 *Biophys* 424:13-5.
- 385 75. Weiss A, Goldman S, Shalev E. 2007. The matrix metalloproteinases (MMPS) in the decidua  
386 and fetal membranes. *Front Biosci* 12:649-59.
- 387 76. Nishihara S, Someya A, Yonemoto H, Ota A, Itoh S, Nagaoka I, Takeda S. 2008. Evaluation of  
388 the expression and enzyme activity of matrix metalloproteinase-7 in fetal membranes during  
389 premature rupture of membranes at term in humans. *Reprod Sci* 15:156-65.
- 390 77. Kumar D, Moore RM, Mercer BM, Mansour JM, Redline RW, Moore JJ. 2016. The physiology  
391 of fetal membrane weakening and rupture: Insights gained from the determination of physical  
392 properties revisited. *Placenta* 42:59-73.
- 393 78. Flores-Pliego A, Espejel-Nunez A, Castillo-Castrejon M, Meraz-Cruz N, Beltran-Montoya J,  
394 Zaga-Clavellina V, Nava-Salazar S, Sanchez-Martinez M, Vadillo-Ortega F, Estrada-Gutierrez  
395 G. 2015. Matrix Metalloproteinase-3 (MMP-3) Is an Endogenous Activator of the MMP-9  
396 Secreted by Placental Leukocytes: Implication in Human Labor. *PLoS One* 10:e0145366.
- 397 79. Sundrani DP, Chavan-Gautam PM, Pisal HR, Mehendale SS, Joshi SR. 2012. Matrix  
398 metalloproteinase-1 and -9 in human placenta during spontaneous vaginal delivery and  
399 caesarean sectioning in preterm pregnancy. *PLoS One* 7:e29855.
- 900 80. Walsh SW, Nugent WH, Solotskaya AV, Anderson CD, Grider JR, Strauss JF, 3rd. 2017.  
901 Matrix Metalloprotease-1 and Elastase Are Novel Uterotonic Agents Acting Through Protease-  
902 Activated Receptor 1. *Reprod Sci* doi:10.1177/1933719117732162:1933719117732162.
- 903 81. Tambor V, Kacerovsky M, Lenco J, Bhat G, Menon R. 2013. Proteomics and bioinformatics  
904 analysis reveal underlying pathways of infection associated histologic chorioamnionitis in  
905 pPROM. *Placenta* 34:155-61.

- 906 82. Harris LK, Smith SD, Keogh RJ, Jones RL, Baker PN, Knofler M, Cartwright JE, Whitley GS,  
907 Aplin JD. 2010. Trophoblast- and vascular smooth muscle cell-derived MMP-12 mediates  
908 elastolysis during uterine spiral artery remodeling. *Am J Pathol* 177:2103-15.
- 909 83. Marder W, Knight JS, Kaplan MJ, Somers EC, Zhang X, O'Dell AA, Padmanabhan V,  
910 Lieberman RW. 2016. Placental histology and neutrophil extracellular traps in lupus and pre-  
911 eclampsia pregnancies. *Lupus Sci Med* 3:e000134.
- 912 84. Gupta AK, Hasler P, Holzgreve W, Gebhardt S, Hahn S. 2005. Induction of neutrophil  
913 extracellular DNA lattices by placental microparticles and IL-8 and their presence in  
914 preeclampsia. *Hum Immunol* 66:1146-54.
- 915 85. Gomez-Lopez N, Romero R, Leng Y, Garcia-Flores V, Xu Y, Miller D, Hassan SS. 2017.  
916 Neutrophil extracellular traps in acute chorioamnionitis: A mechanism of host defense. *Am J*  
917 *Reprod Immunol* 77.
- 918 86. Kothary V, Doster RS, Rogers LM, Kirk LA, Boyd KL, Romano-Keeler J, Haley KP, Manning  
919 SD, Aronoff DM, Gaddy JA. 2017. Group B Streptococcus Induces Neutrophil Recruitment to  
920 Gestational Tissues and Elaboration of Extracellular Traps and Nutritional Immunity. *Front Cell*  
921 *Infect Microbiol* 7:19.
- 922 87. Boldenow E, Gendrin C, Ngo L, Bierle C, Vornhagen J, Coleman M, Merillat S, Armistead B,  
923 Whidbey C, Alishetti V, Santana-Ufret V, Ogle J, Gough M, Srinouanprachanh S, MacDonald  
924 JW, Bammler TK, Bansal A, Liggitt HD, Rajagopal L, Waldorf KM. 2016. Group B  
925 Streptococcus circumvents neutrophils and neutrophil extracellular traps during amniotic cavity  
926 invasion and preterm labor. *Sci Immunol* 1.
- 927 88. Carey AJ, Tan CK, Mirza S, Irving-Rodgers H, Webb RI, Lam A, Ulett GC. 2014. Infection and  
928 cellular defense dynamics in a novel 17beta-estradiol murine model of chronic human group B  
929 streptococcus genital tract colonization reveal a role for hemolysin in persistence and  
930 neutrophil accumulation. *J Immunol* 192:1718-31.

- 931 89. Korir ML, Laut C, Rogers LM, Plemmons JA, Aronoff DM, Manning SD. 2016. Differing  
932 mechanisms of surviving phagosomal stress among group B Streptococcus strains of varying  
933 genotypes. *Virulence* doi:10.1080/21505594.2016.1252016:1-14.
- 934 90. Manning SD, Lewis MA, Springman AC, Lehotzky E, Whittam TS, Davies HD. 2008. Genotypic  
935 diversity and serotype distribution of group B streptococcus isolated from women before and  
936 after delivery. *Clin Infect Dis* 46:1829-37.
- 937 91. Gendrin C, Vornhagen J, Armistead B, Singh P, Whidbey C, Merillat S, Knupp D, Parker R,  
938 Rogers LM, Quach P, Iyer LM, Aravind L, Manning SD, Aronoff DM, Rajagopal L. 2017. A non-  
939 hemolytic Group B Streptococcus strain exhibits hypervirulence. *J Infect Dis*  
940 doi:10.1093/infdis/jix646.
- 941 92. Manning SD, Springman AC, Lehotzky E, Lewis MA, Whittam TS, Davies HD. 2009. Multilocus  
942 sequence types associated with neonatal group B streptococcal sepsis and meningitis in  
943 Canada. *J Clin Microbiol* 47:1143-8.
- 944 93. Iqbal J, Dufendach KR, Wellons JC, Kuba MG, Nickols HH, Gomez-Duarte OG, Wynn JL.  
945 2016. Lethal neonatal meningoencephalitis caused by multi-drug resistant, highly virulent  
946 *Escherichia coli*. *Infect Dis (Lond)* 48:461-6.
- 947 94. Schindelin J, Arganda-Carreras I, Frise E, Kaynig V, Longair M, Pietzsch T, Preibisch S,  
948 Rueden C, Saalfeld S, Schmid B, Tinevez JY, White DJ, Hartenstein V, Eliceiri K, Tomancak  
949 P, Cardona A. 2012. Fiji: an open-source platform for biological-image analysis. *Nat Methods*  
950 9:676-82.
- 951 95. McCloy RA, Rogers S, Caldon CE, Lorca T, Castro A, Burgess A. 2014. Partial inhibition of  
952 Cdk1 in G 2 phase overrides the SAC and decouples mitotic events. *Cell Cycle* 13:1400-12.
- 953 96. Doster RS, Kirk LA, Tetz LM, Rogers LM, Aronoff DM, Gaddy JA. 2017. *Staphylococcus*  
954 *aureus* Infection of Human Gestational Membranes Induces Bacterial Biofilm Formation and  
955 Host Production of Cytokines. *J Infect Dis* 215:653-657.
- 956



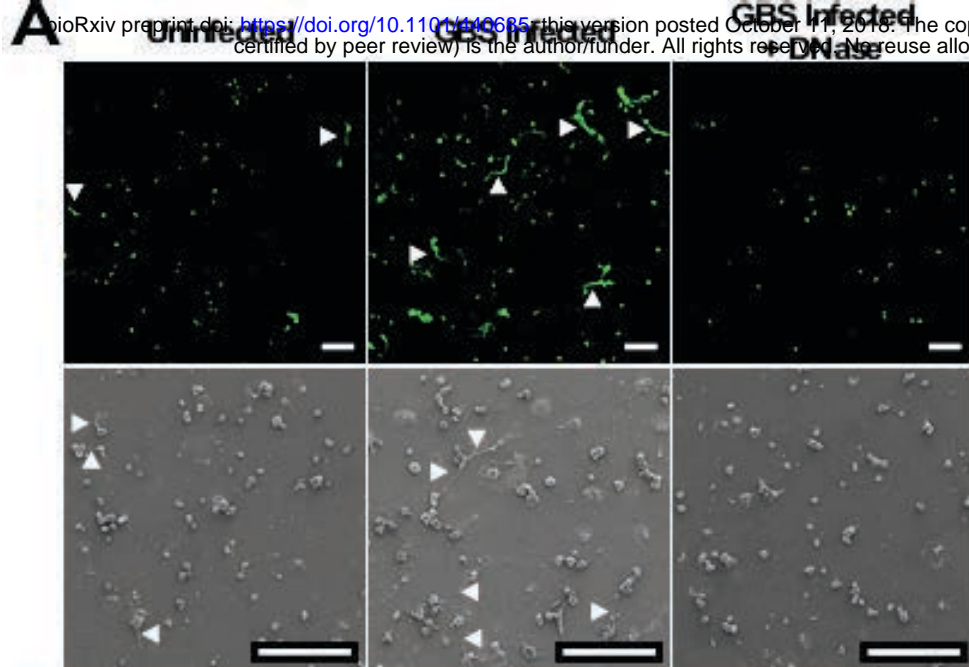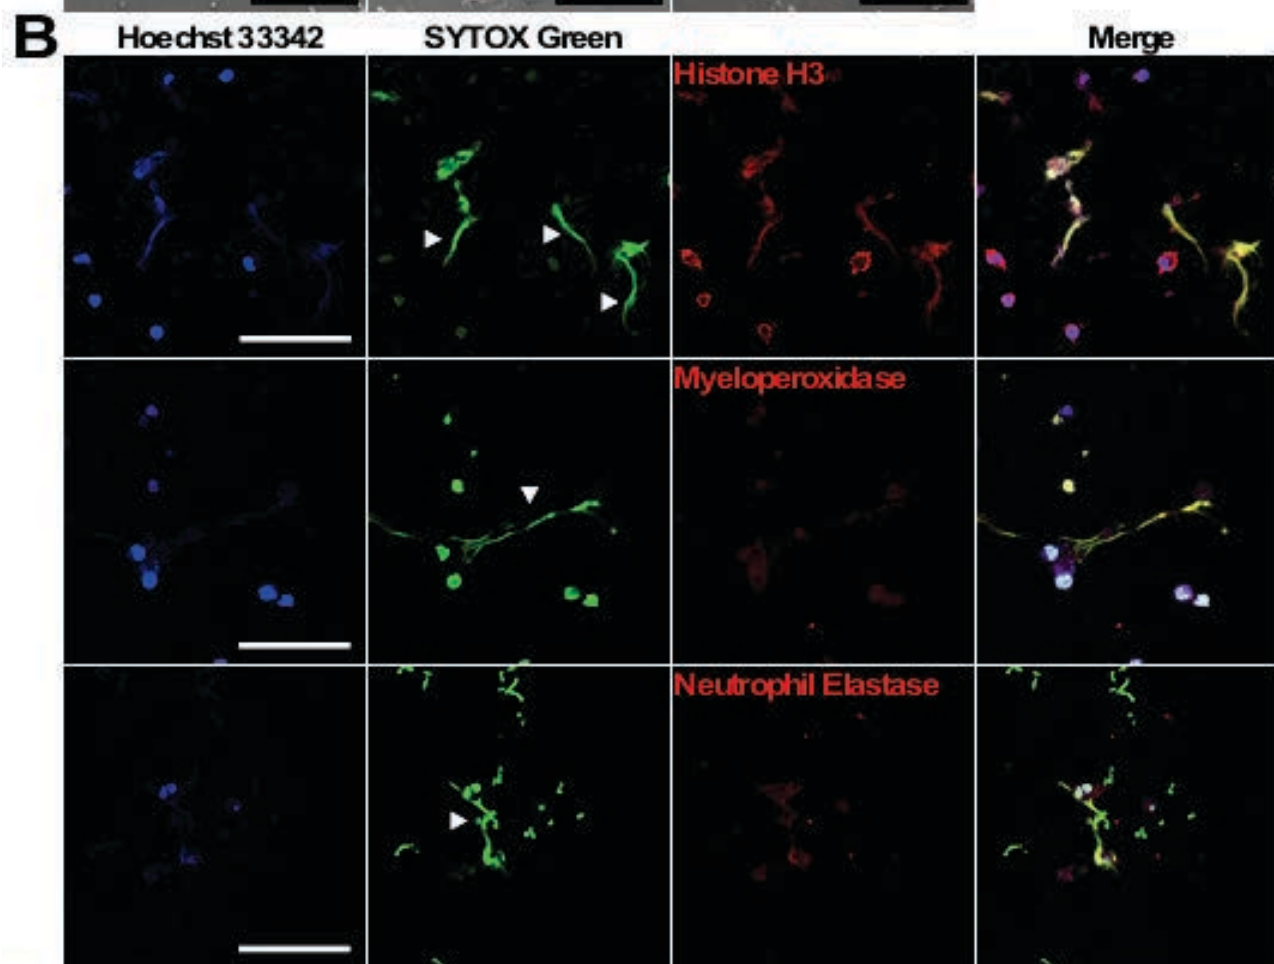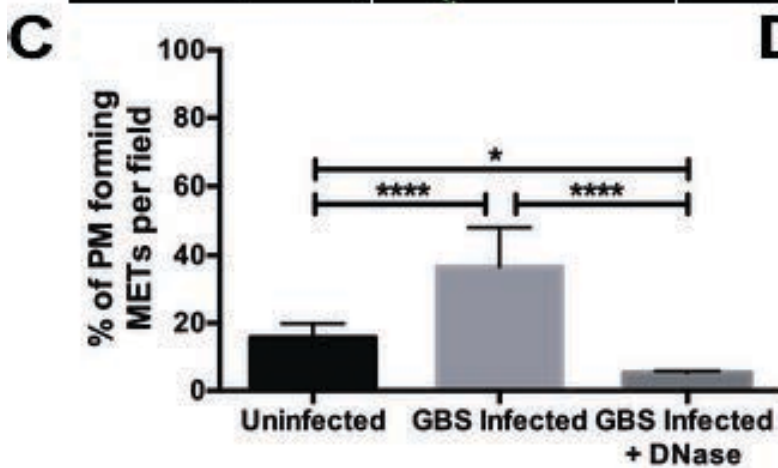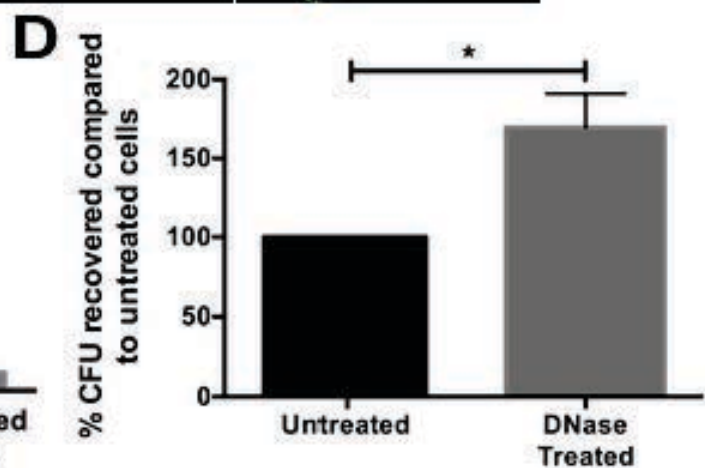

**A**

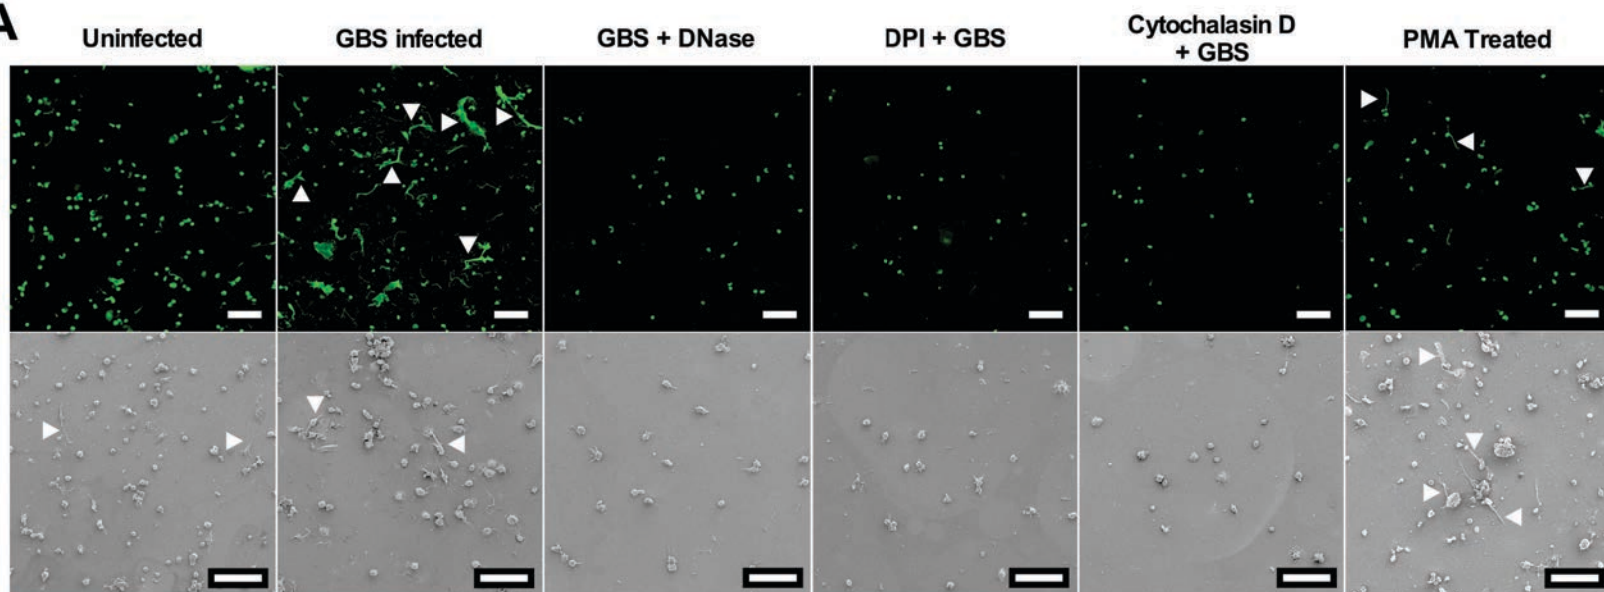

**B**

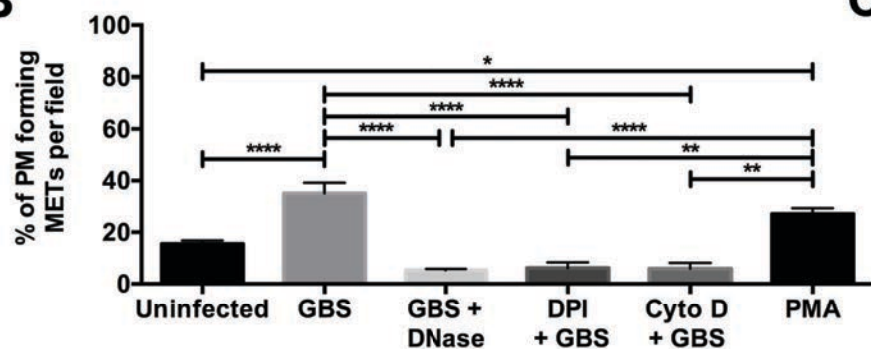

**C**

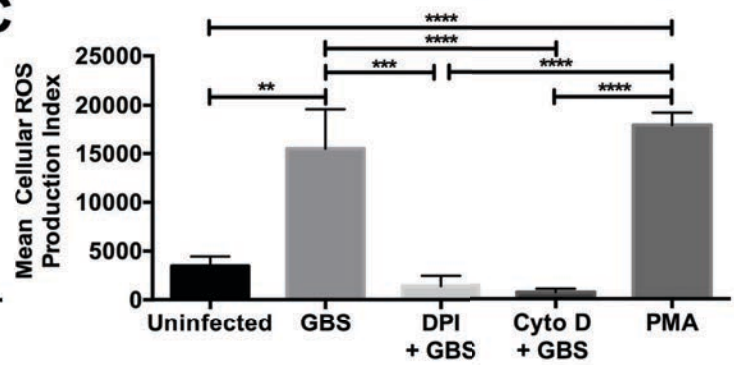

**D**

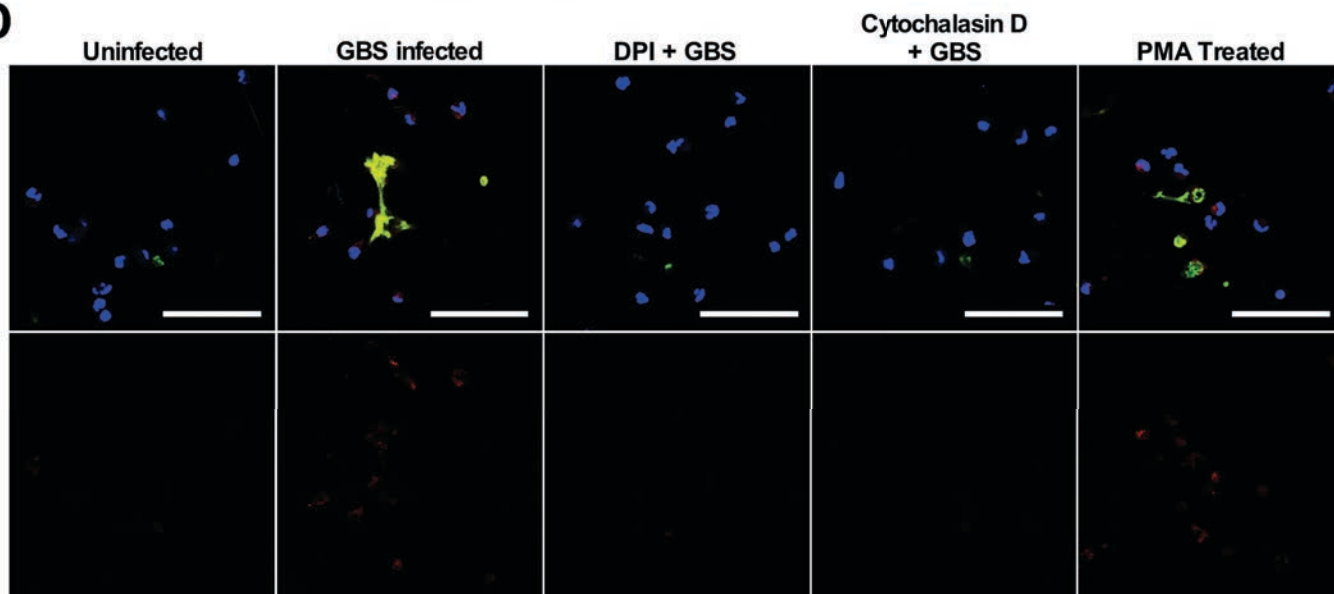



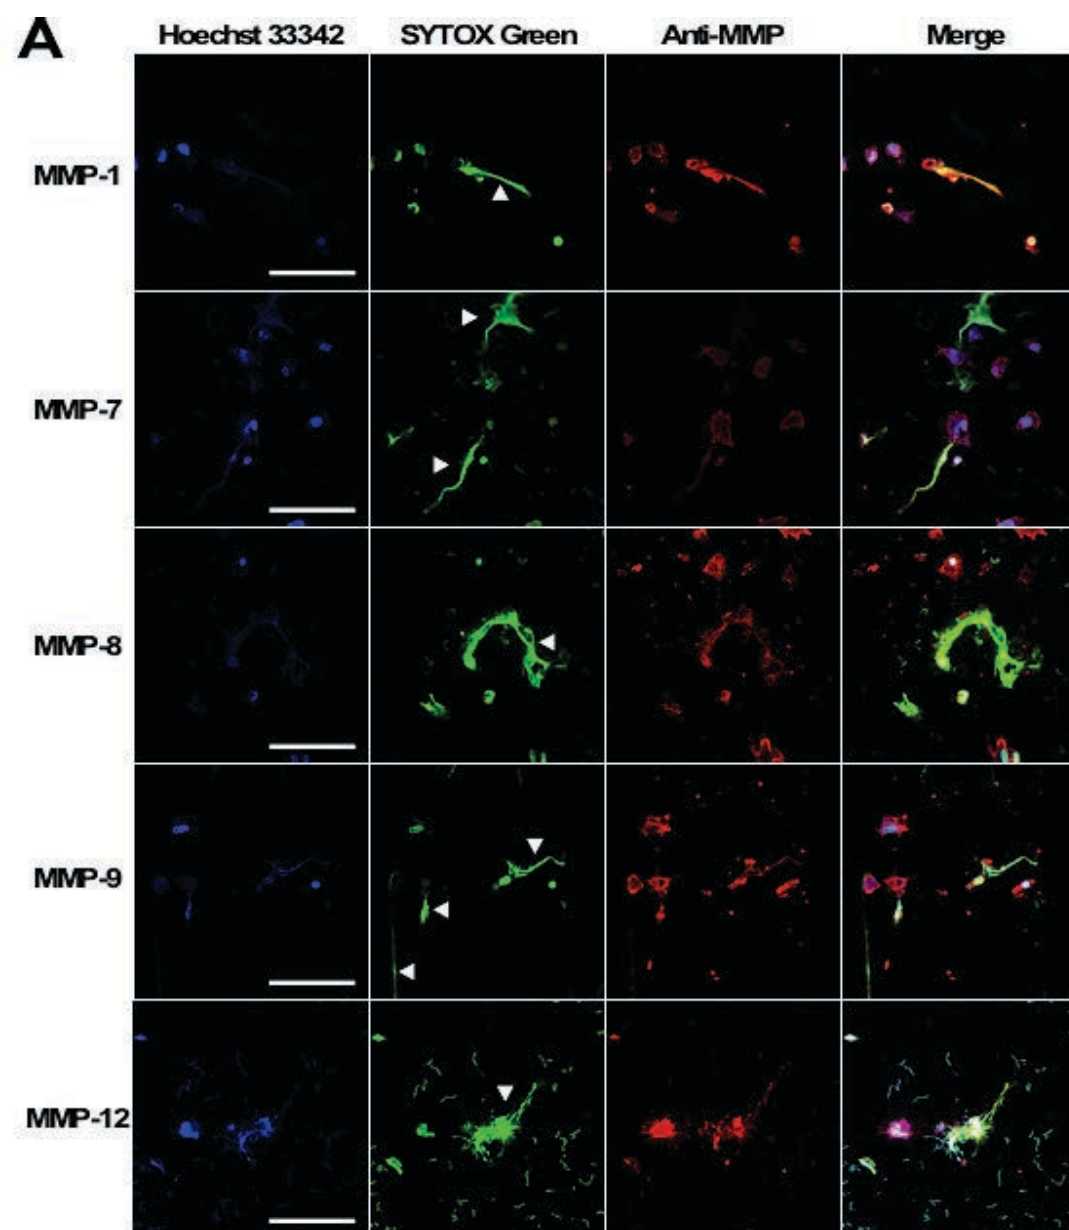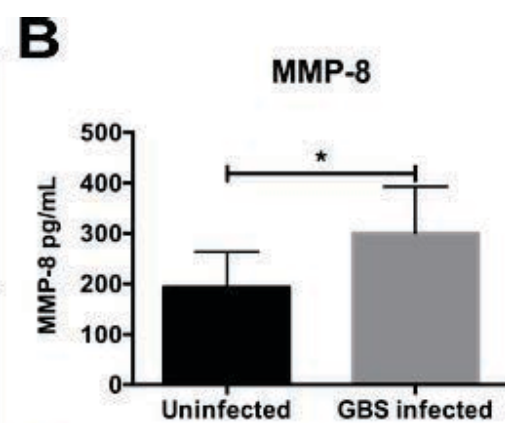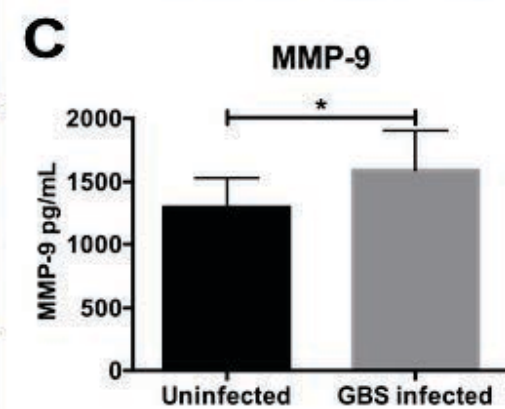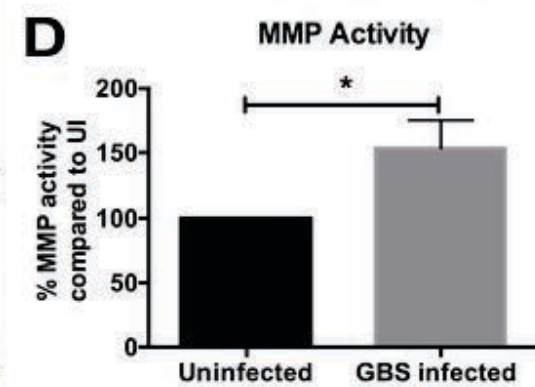

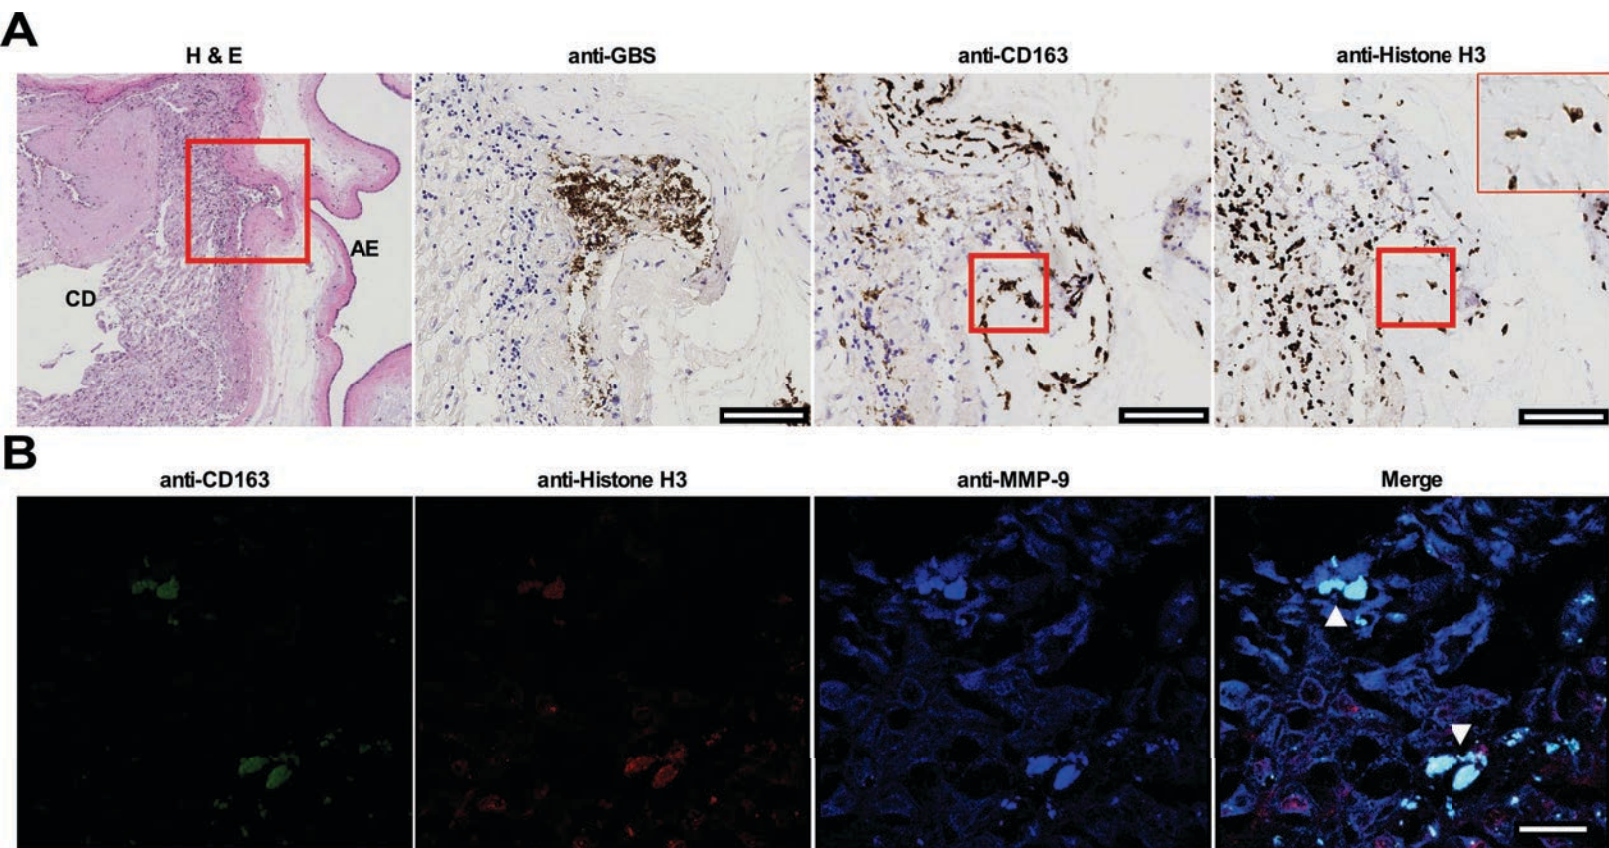

Source: https://www.biorxiv.org/content/10.1101/440685v1.full.pdf
